# Supplementary material
Source: PubMed Central journal article supplement (PMC3757927)
Supplement: NIHMS476827-supplement-1_si_001.pdf [file NIHMS476827-supplement-1_si_001.pdf]

## Supporting Information

### Heterolytic H<sub>2</sub> Cleavage and Catalytic Hydrogenation by an Iron Metallaboratrane

Henry Fong, Marc-Etienne Moret, Yunho Lee, and Jonas C. Peters\*

#### **Contents**

|                                          |    |
|------------------------------------------|----|
| Experimental.....                        | 1  |
| NMR Spectra/Data.....                    | 3  |
| <sup>1</sup> H NMR Spectra.....          | 3  |
| <sup>31</sup> P NMR Spectra.....         | 10 |
| Variable Temperature NMR.....            | 18 |
| T <sub>1min</sub> Measurements.....      | 20 |
| Miscellaneous NMR Data.....              | 20 |
| IR Spectra.....                          | 23 |
| UV-Vis Spectra.....                      | 29 |
| Catalytic Hydrogenation Time Traces..... | 35 |
| GC-MS Data.....                          | 36 |
| XRD Data.....                            | 37 |
| DFT Coordinates.....                     | 41 |

#### **Experimental**

Geometry optimizations were performed using the Gaussian03 package.<sup>1</sup> B3LYP exchange-correlation functional was employed with a 6-31G(d) basis set. The GDIIS algorithm was used.

---

<sup>1</sup> Frisch, M. J.; Trucks, G. W.; Schlegel, H. B.; Scuseria, G. E.; Robb, M. A.; Cheeseman, J. R.; J. A. Montgomery, J.; Vreven, T.; Kudin, K. N.; Burant, J. C.; Millam, J. M.; Iyengar, S. S.; Tomasi, J.; Barone, V.; Mennucci, B.; Cossi, M.; Scalmani, G.; Rega, N.; Petersson, G. A.; Nakatsuji, H.; Hada, M.; Ehara, M.; Toyota, K.; Fukuda, R.; Hasegawa, J.; Ishida, M.; Nakajima, T.; Honda, Y.; Kitao, O.; Nakai, H.; Klene, M.; Li, X.; Knox, J. E.; Hratchian, H. P.; Cross, J. B.;

A full frequency calculation was performed on each structure to ensure that they were the true minima. A single negative vibrational frequency was observed for the transition state between **3** and its equatorial-H<sub>2</sub> isomer, confirming that this structure was the transition state. See SI for full a description of the computational method.

To determine the energy difference between **3** and its equatorial-H<sub>2</sub> isomer, the energy differences of the respective DFT calculated isomers were compared. The coordinates derived from the XRD structure of **2** were used as the input coordinates. The dinitrogen ligand was replaced with a dihydrogen ligand (H-H distance = 0.9 Å). For the equatorial-H<sub>2</sub> isomer, an axial hydride ligand *trans* to boron along with an equatorial H<sub>2</sub> (H-H distance = 0.9 Å) ligand bisecting P2 and P3 were used in the starting geometry. For the H<sub>2</sub> ligand, the H-H bond was parallel to the Fe-B bond. The starting and optimized coordinates are listed below (see page S42).

---

Bakken, V.; Adamo, C.; Jaramillo, J.; Gomperts, R.; Stratmann, R. E.; Yazyev, O.; Austin, A. J.; Cammi, R.; Pomelli, C.; Ochterski, J. W.; Ayala, P. Y.; Morokuma, K.; G. A. Voth, P. S.; Dannenberg, J. J.; Zakrzewski, V. G.; Dapprich, S.; Daniels, A. D.; Strain, M. C.; Farkas, O.; Malick, D. K.; Rabuck, A. D.; Raghavachari, K.; Foresman, J. B.; Ortiz, J. V.; Cui, Q.; Baboul, A. G.; Clifford, S.; Cioslowski, J.; Stefanov, B. B.; Liu, G.; Liashenko, A.; Piskorz, P.; Komaromi, I.; Martin, R. L.; Fox, D. J.; Keith, T.; Al-Laham, M. A.; Peng, C. Y.; Nanayakkara, A.; Challacombe, M.; Gill, P. M. W.; Johnson, B.; Chen, W.; Wong, M. W.; Gonzalez, C.; Pople, J. A.; Gaussian, Inc.: Wallingford, 2004.

## NMR Spectra/Data

### *<sup>1</sup>H NMR Spectra*

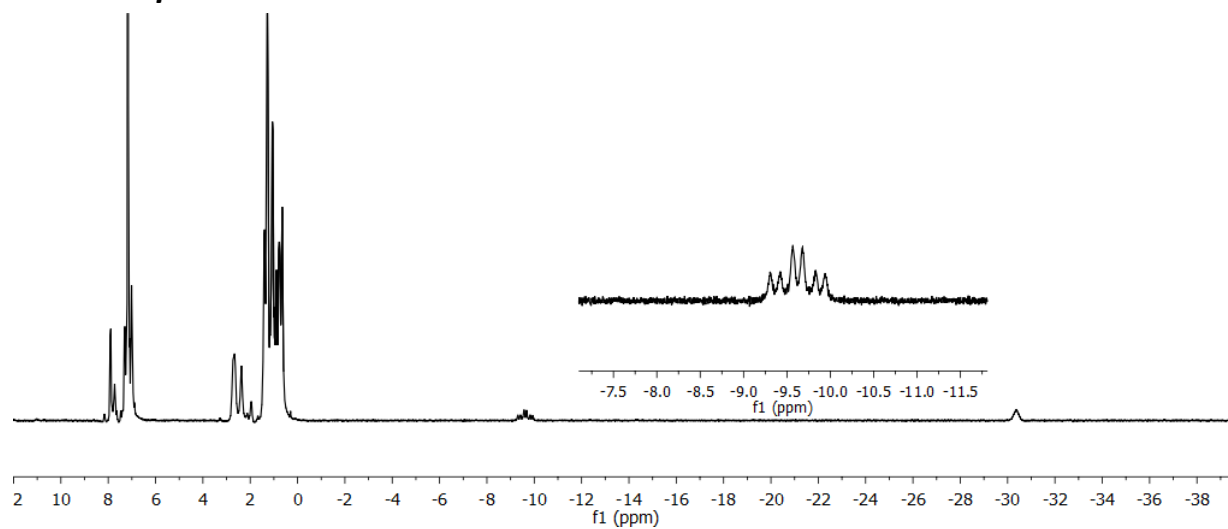

**Fig. S1** <sup>1</sup>H NMR spectrum of **2**, (TPB)(μ-H)Fe(N<sub>2</sub>)(H), in C<sub>6</sub>D<sub>6</sub>.

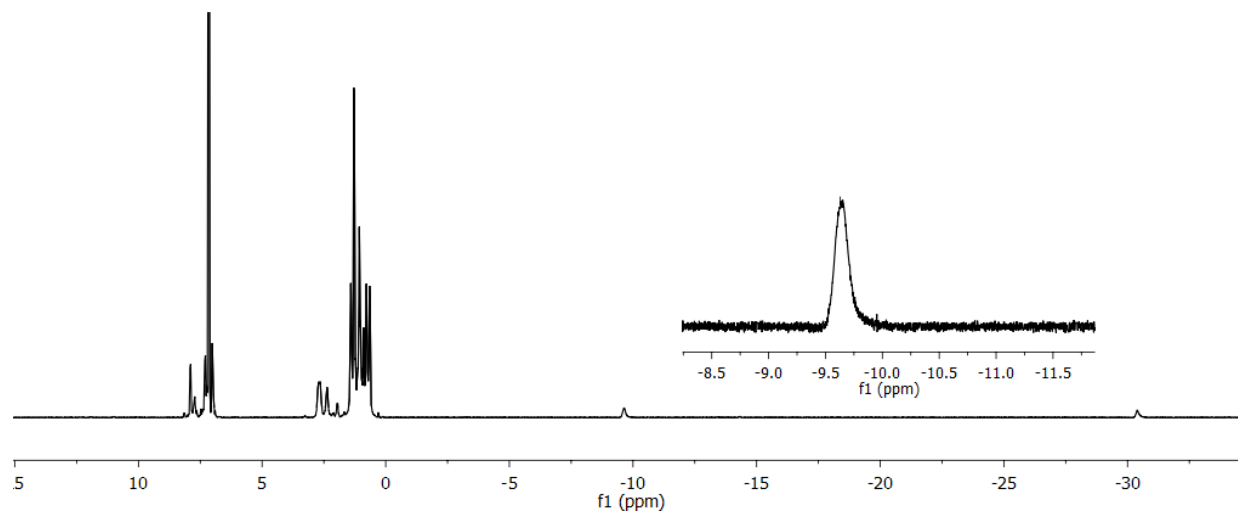

**Fig. S2** <sup>1</sup>H{<sup>31</sup>P} NMR spectrum of **2**, (TPB)(μ-H)Fe(N<sub>2</sub>)(H), in C<sub>6</sub>D<sub>6</sub>.

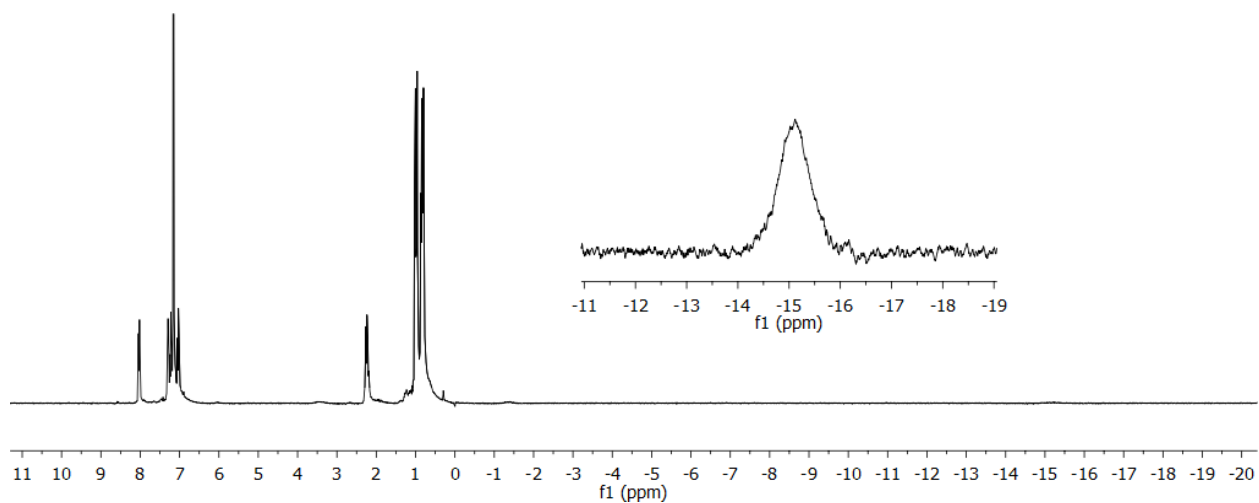

**Fig. S3**  $^1\text{H}$  NMR spectrum of **3**,  $(\text{TPB})(\mu\text{-H})\text{Fe}(\text{H}_2)(\text{H})$ , in  $\text{C}_6\text{D}_6$ .

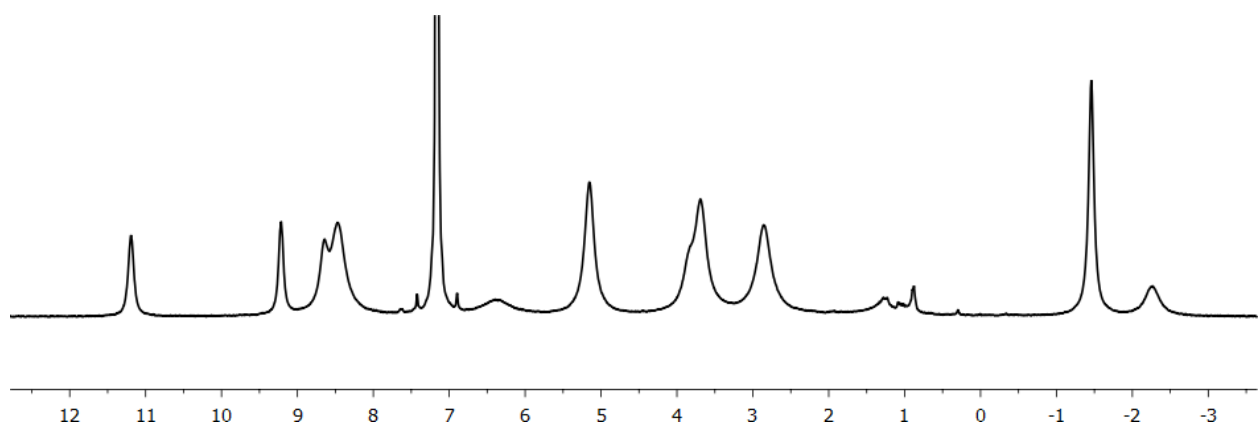

**Fig. S4**  $^1\text{H}$  NMR spectrum of **4**,  $(\text{TPB})\text{Fe}(\text{CN}^t\text{Bu})$ , in  $\text{C}_6\text{D}_6$ .

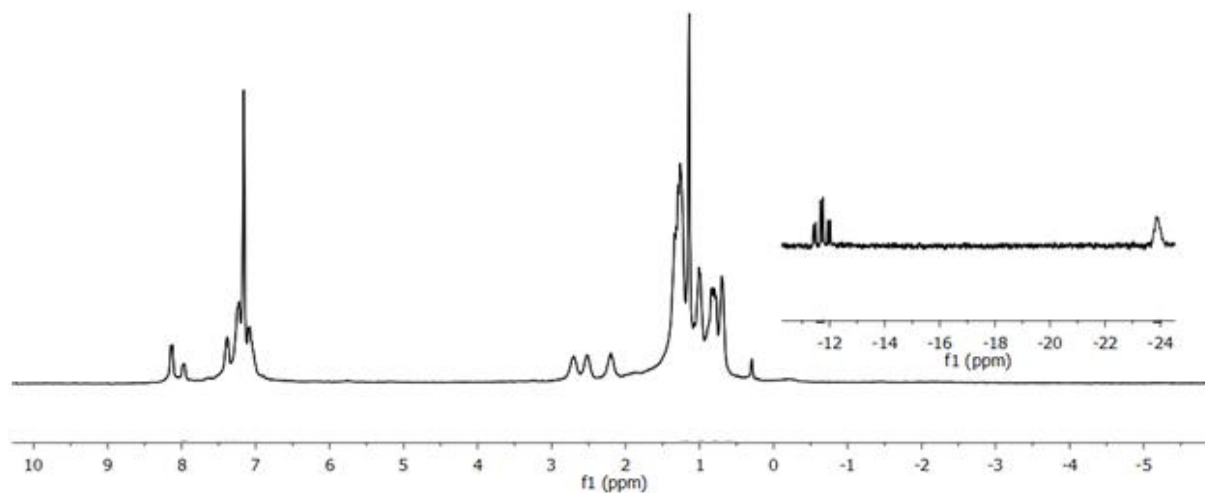

**Fig. S5**  $^1\text{H}$  NMR spectrum of **5**,  $(\text{TPB})(\mu\text{-H})\text{Fe}(\text{CN}^t\text{Bu})(\text{H})$ , in  $\text{C}_6\text{D}_6$ .

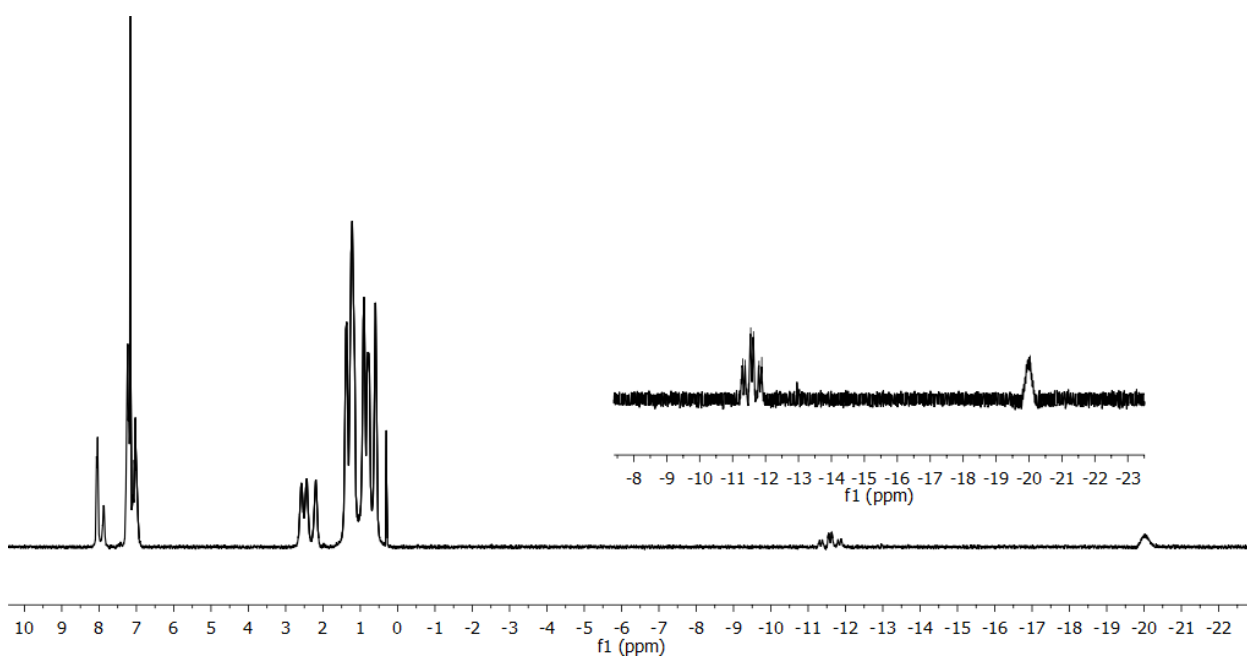

**Fig. S6**  $^1\text{H}$  NMR spectrum of **7**,  $(\text{TPB})(\mu\text{-H})\text{Fe}(\text{CO})(\text{H})$ , in  $\text{C}_6\text{D}_6$ .

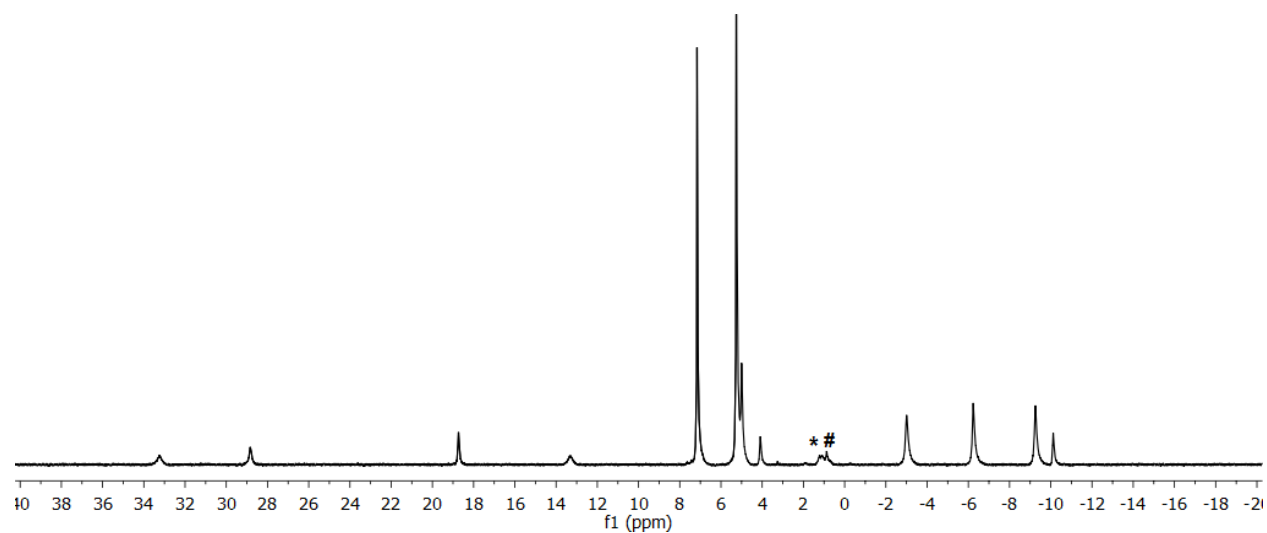

**Fig. S7.**  $^1\text{H}$  NMR spectrum of **8**,  $(\text{TPB})\text{Fe}(\text{C}_2\text{H}_4)$ , in  $\text{C}_6\text{D}_6$  under 1 atm  $\text{C}_2\text{H}_4$ . \* Residual pentane. # Ethane from ethylene source.

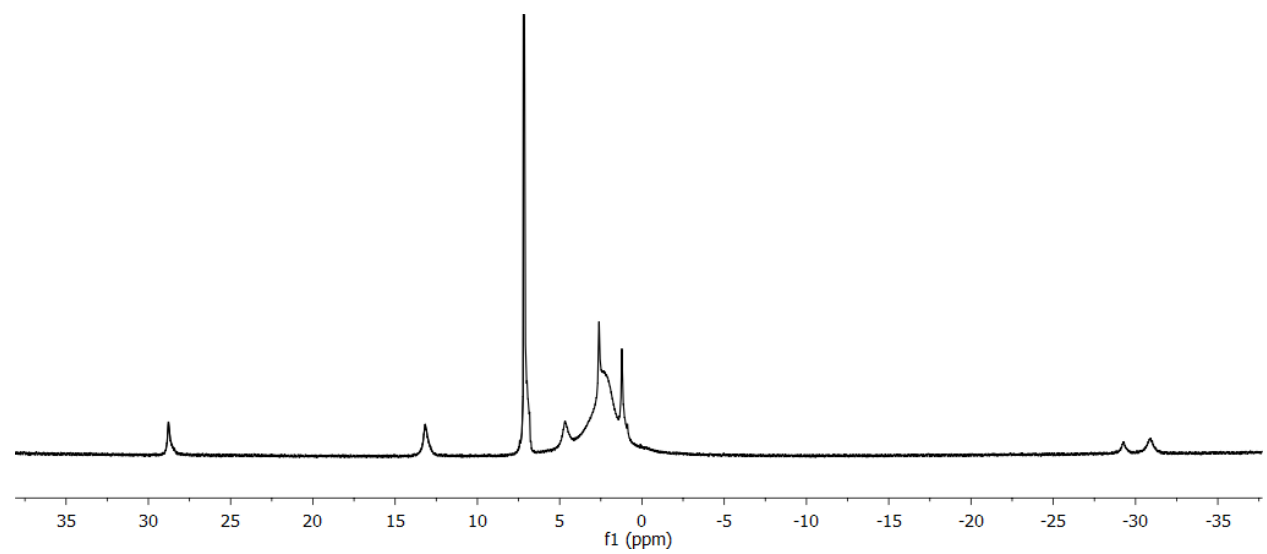

**Fig. S8**  $^1\text{H}$  NMR spectrum of **9**,  $(\text{TPBH})\text{Fe}(\text{C}\equiv\text{CPh})$ , in  $\text{C}_6\text{D}_6$ .

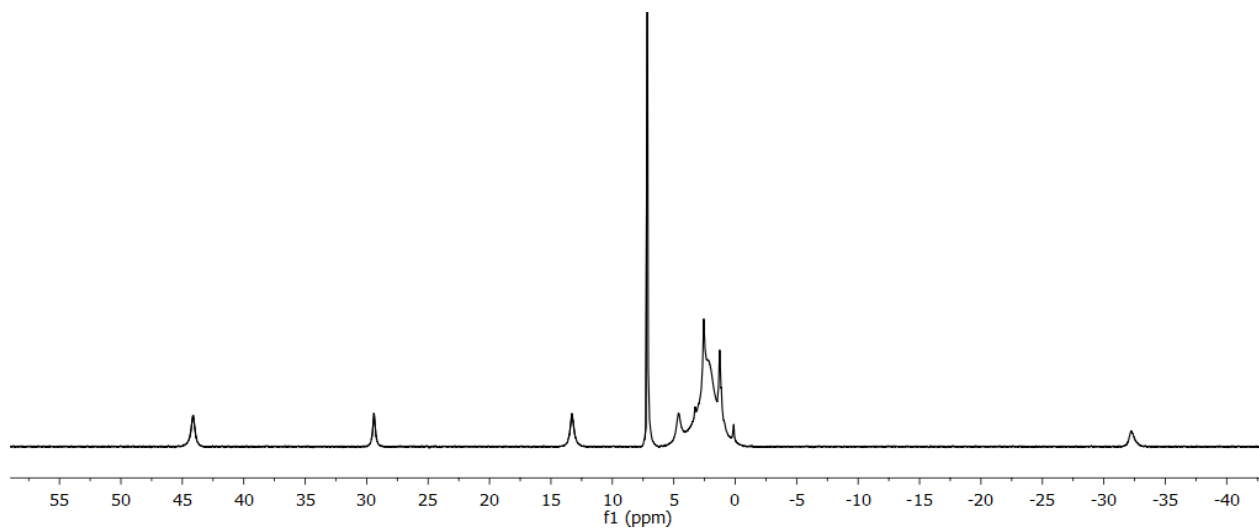

**Fig. S9** <sup>1</sup>H NMR spectrum of **10**, (TPBH)Fe(C≡CTol), in C<sub>6</sub>D<sub>6</sub>.

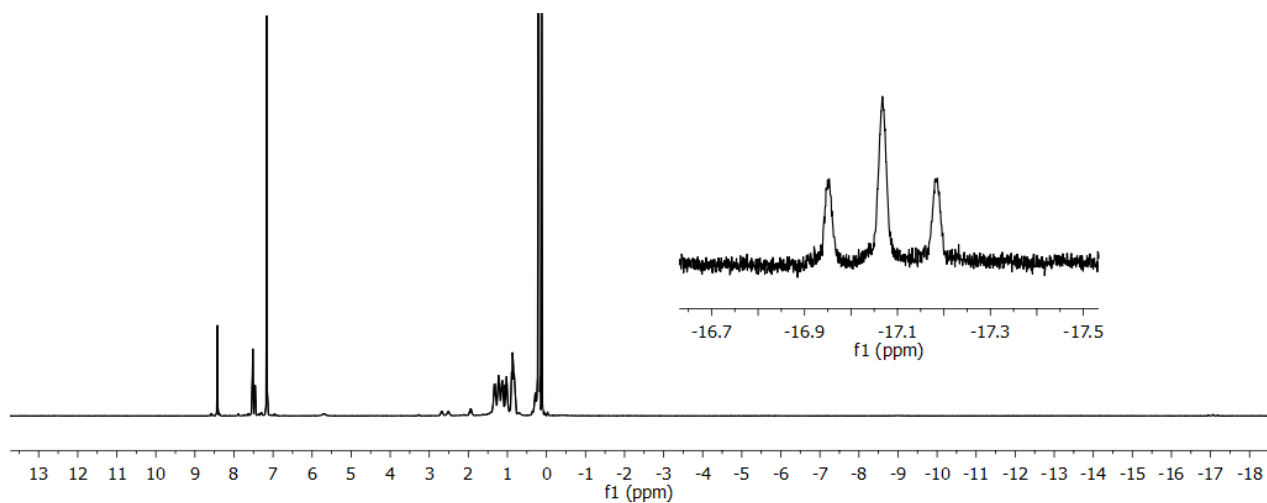

**Fig. S10** <sup>1</sup>H NMR spectrum of **11** in C<sub>6</sub>D<sub>6</sub>

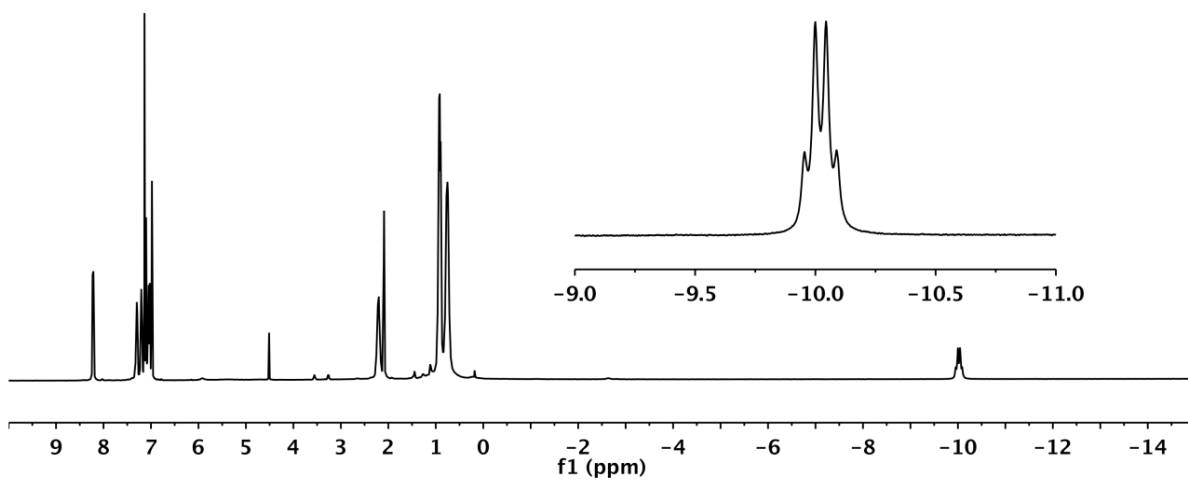

Fig. S11  $^1\text{H}$  NMR spectrum of  $(\text{SiP}^{i\text{Pr}}_3)\text{Fe}(\text{H}_2)(\text{H})$  in  $\text{C}_6\text{D}_6$ .

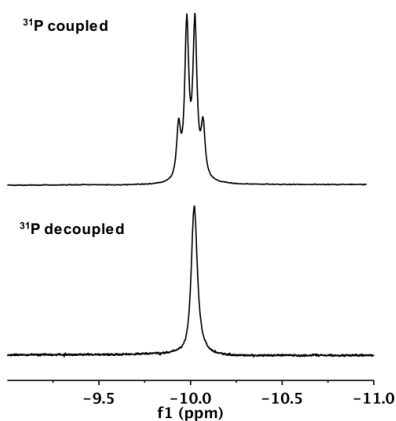

Fig. S12 Hydride resonances of the  $^1\text{H}$  and  $^1\text{H}\{^{31}\text{P}\}$  NMR spectrum of  $(\text{SiP}^{i\text{Pr}}_3)\text{Fe}(\text{H}_2)(\text{H})$  in  $\text{C}_6\text{D}_6$ .

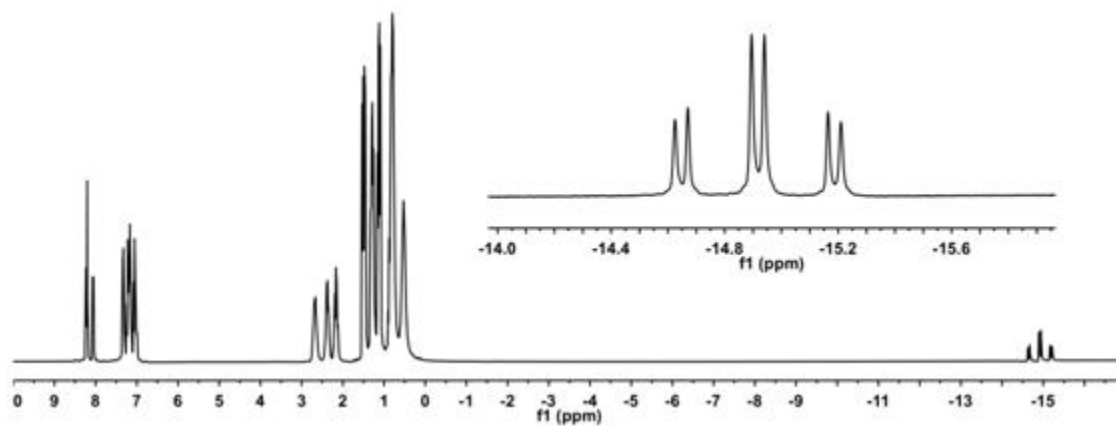

Fig. S13  $^1\text{H}$  NMR spectrum of  $(\text{SiP}^{i\text{Pr}}_3)\text{Fe}(\text{CO})(\text{H})$  in  $d_8$ -toluene.



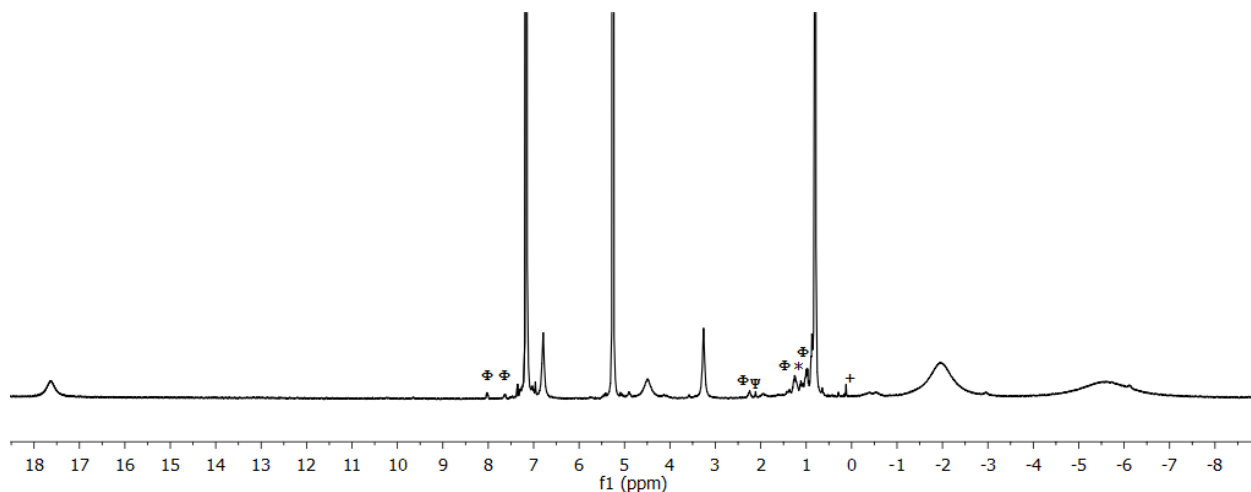

**Fig. S14**  $^1\text{H}$  NMR spectrum of **A**,  $(\text{TPBH})\text{Fe}(\text{Et})$ , in  $\text{C}_6\text{D}_6$ .  $\Phi$  Compound **2**.  $\Psi$  Residual hexamethylbenzene. \* Residual pentane. + Residual silicon grease.

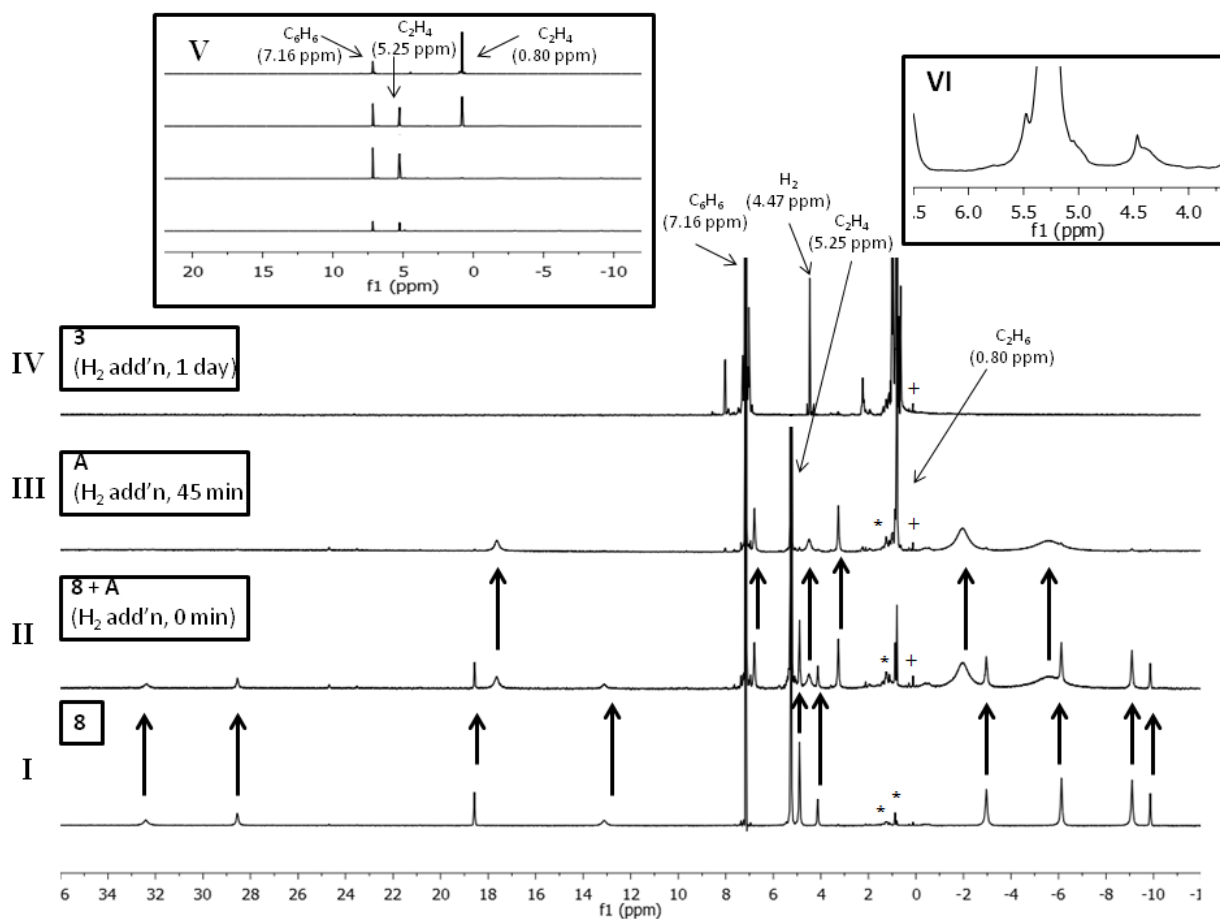

**Fig. S15** Stacked  $^1\text{H}$  NMR spectra of the reaction of **8** with  $\text{H}_2$  (1 atm) and  $\text{C}_2\text{H}_4$  (1 atm) in  $\text{C}_6\text{D}_6$ . (I) Compound **8** under a  $\text{C}_2\text{H}_4$  atmosphere. (II) Mixture of compounds **8** and **A** immediately following  $\text{H}_2$  addition. (III) Compound **A** was formed after mixing the reaction for *ca.* 45 min;  $\text{H}_2$

was added to replenish the consumed H<sub>2</sub>. (IV) Compound **3** was formed at the conclusion of the reaction. (inset V) Zoom out of spectra. (inset VI) Zoom in to show the H<sub>2</sub> resonance. \*Residual pentane. †Residual silicon grease.

### ***<sup>31</sup>P NMR Spectra***

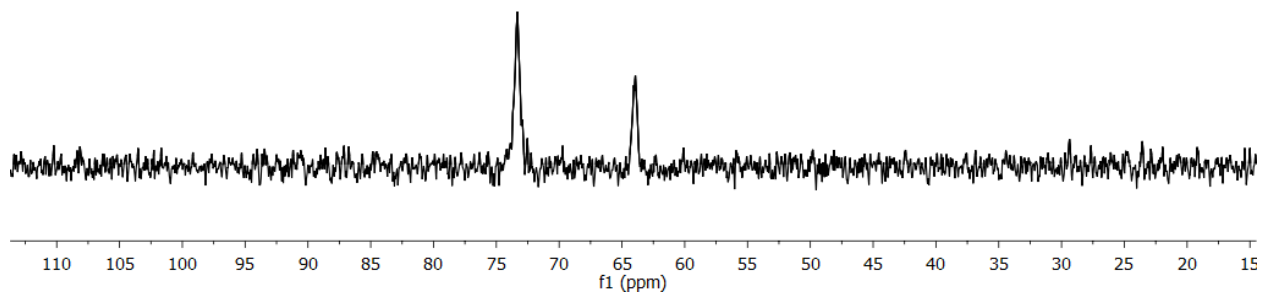

**Fig. S16** <sup>31</sup>P NMR spectrum of **2**, (TPB)(μ-H)Fe(N<sub>2</sub>)(H), in C<sub>6</sub>D<sub>6</sub>.

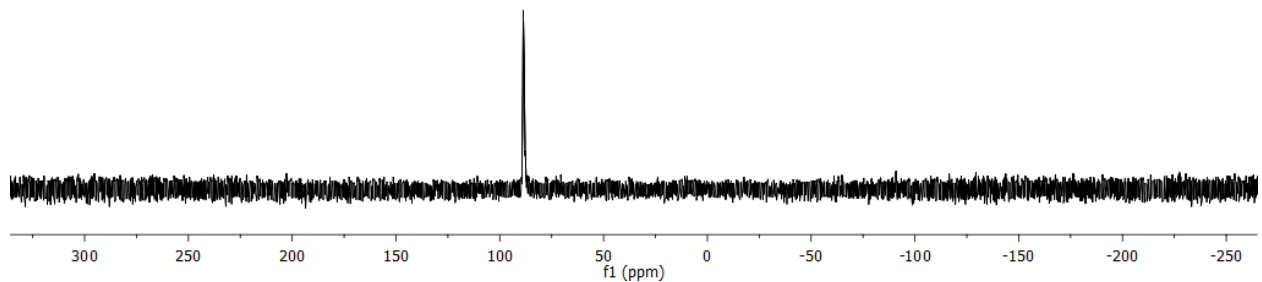

**Fig. S17** <sup>31</sup>P NMR spectrum of **3**, (TPB)(μ-H)Fe(H<sub>2</sub>)(H), in C<sub>6</sub>D<sub>6</sub>.

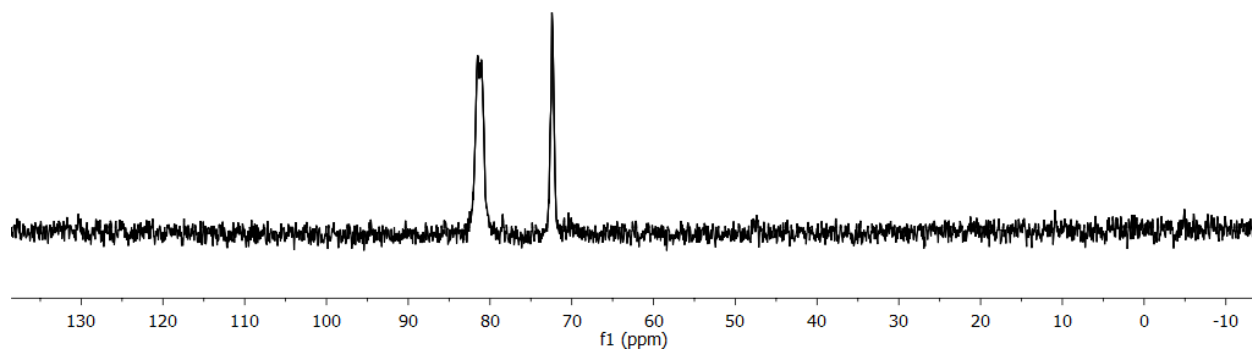

**Fig. S18**  $^{31}\text{P}$  NMR spectrum of **5**,  $(\text{TPB})(\mu\text{-H})\text{Fe}(\text{CN}^t\text{Bu})(\text{H})$ , in  $\text{C}_6\text{D}_6$ .

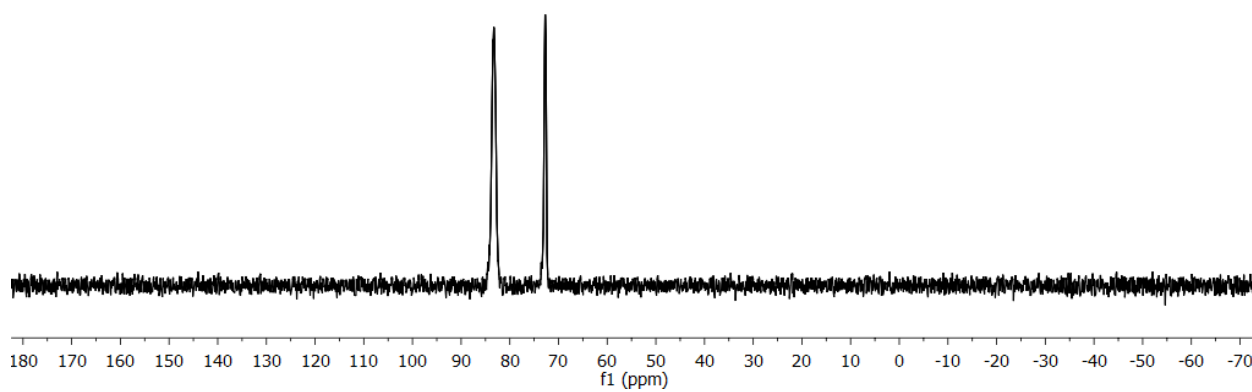

**Fig. S19**  $^{31}\text{P}$  NMR spectrum of **7**,  $(\text{TPB})(\mu\text{-H})\text{Fe}(\text{CO})(\text{H})$ , in  $\text{C}_6\text{D}_6$ .

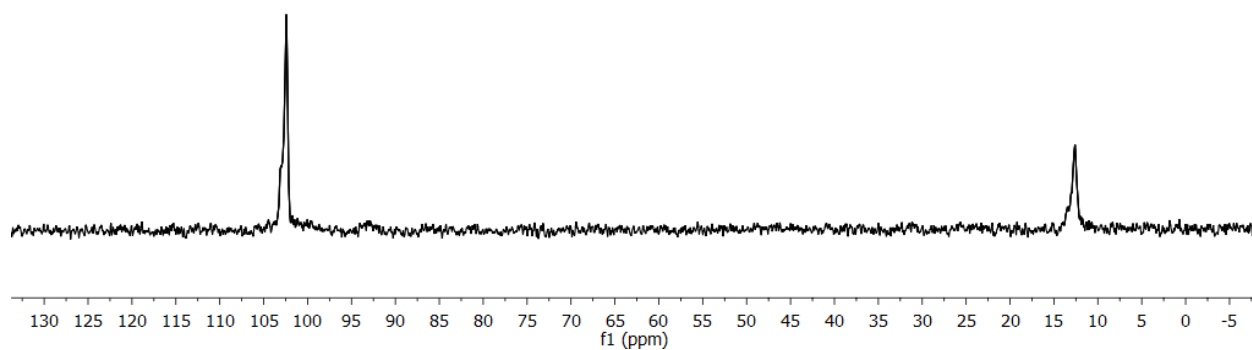

**Fig. S20**  $^{31}\text{P}$  NMR spectrum of **11** in  $\text{C}_6\text{D}_6$ .

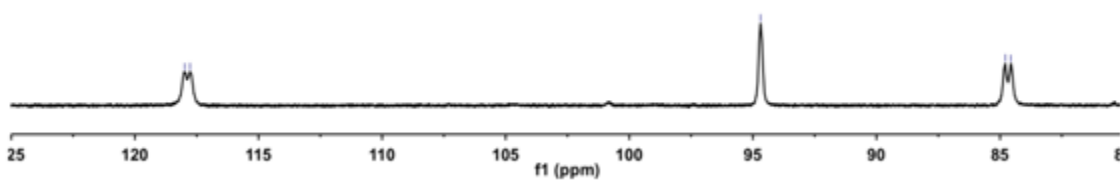

**Fig. S21**  $^{31}\text{P}$  NMR spectrum of  $(\text{SiP}^{i\text{Pr}}_3)\text{Fe}(\text{H}_2)(\text{H})$ , in  $d_8$ -toluene at  $-80^\circ\text{C}$ .

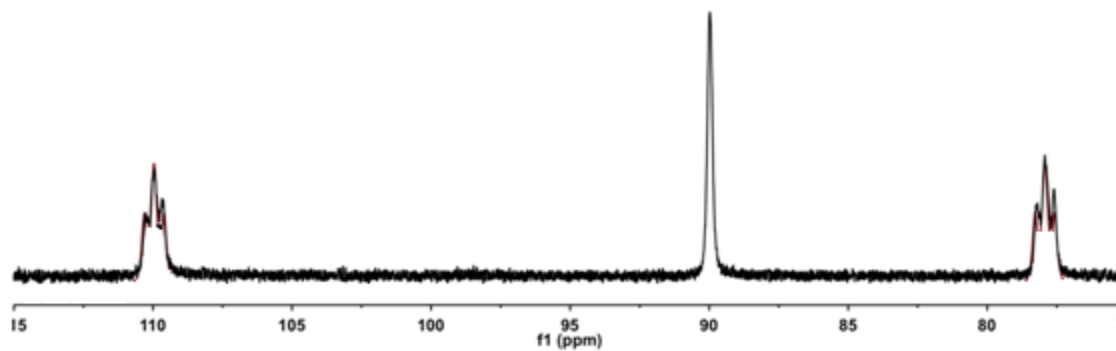

**Fig. S22**  $^{31}\text{P}$  NMR spectrum of  $(\text{SiP}^{i\text{Pr}}_3)\text{Fe}(\text{CO})(\text{H})$ , in  $d_8$ -toluene at  $-90^\circ\text{C}$ .

## $^{13}\text{C}$ NMR Spectra

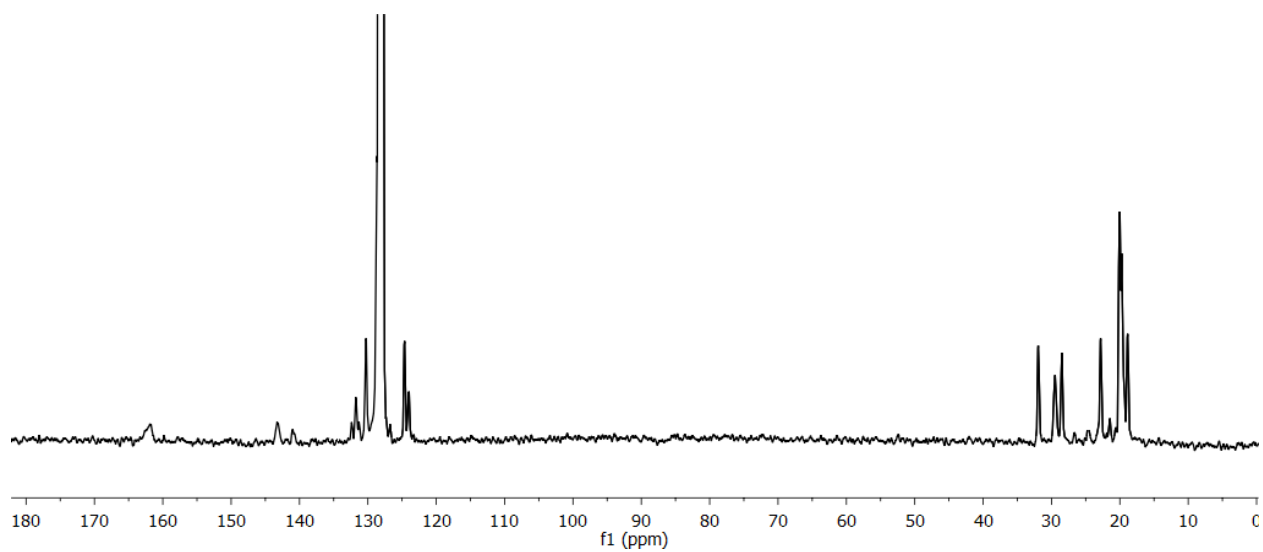

**Fig. S23**  $^{13}\text{C}$  NMR spectrum of **2**,  $(\text{TPB})(\mu\text{-H})\text{Fe}(\text{N}_2)(\text{H})$ , in  $\text{C}_6\text{D}_6$ .

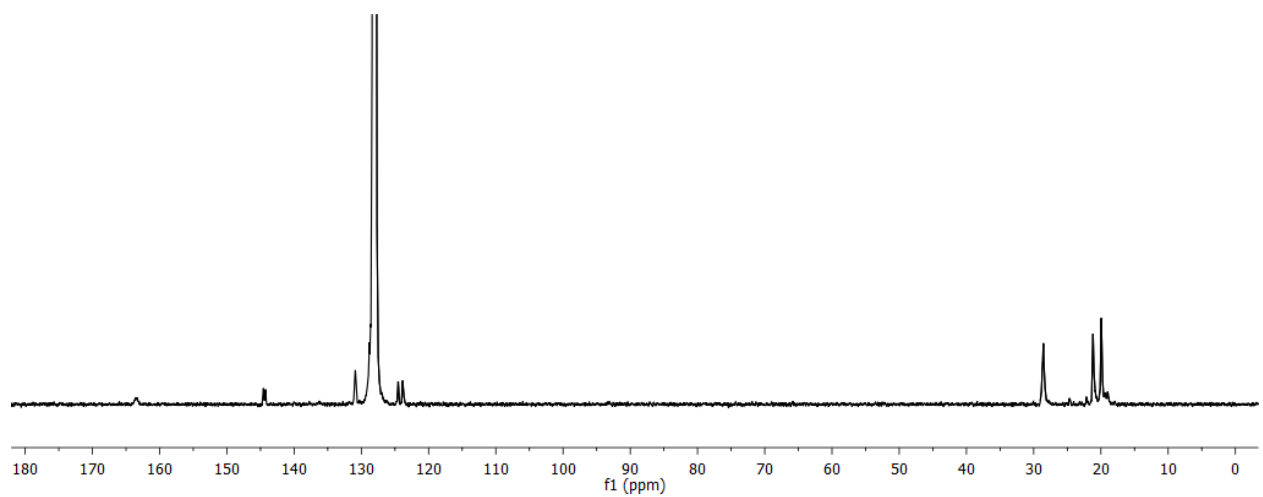

**Fig. S24**  $^{13}\text{C}$  NMR spectrum of **3**,  $(\text{TPB})(\mu\text{-H})\text{Fe}(\text{H}_2)(\text{H})$ , in  $\text{C}_6\text{D}_6$ .

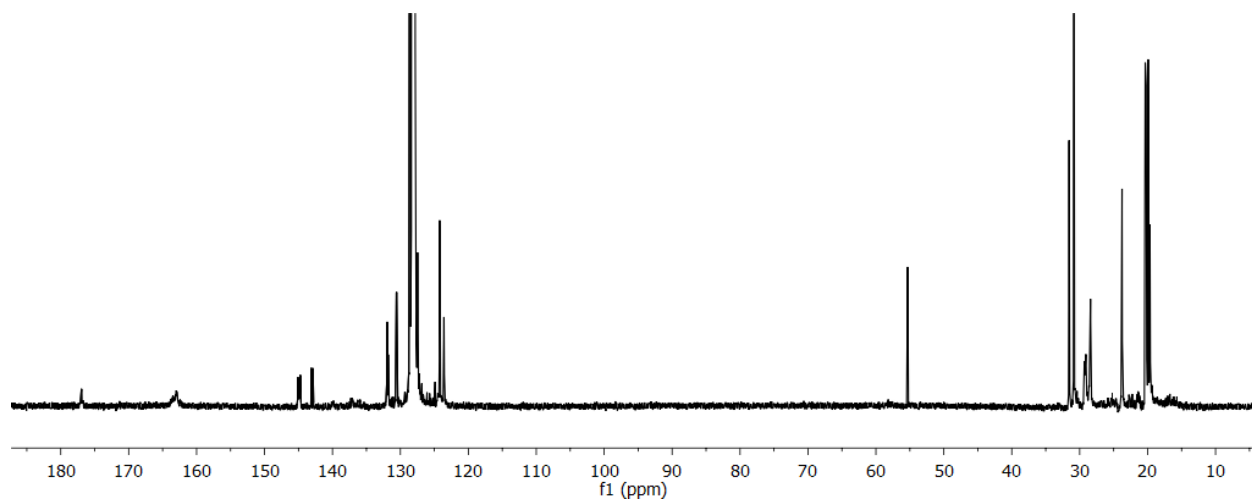

Fig. S25  $^{13}\text{C}$  NMR spectrum of **5**,  $(\text{TPB})(\mu\text{-H})\text{Fe}(\text{CN}^t\text{Bu})(\text{H})$ , in  $\text{C}_6\text{D}_6$ .

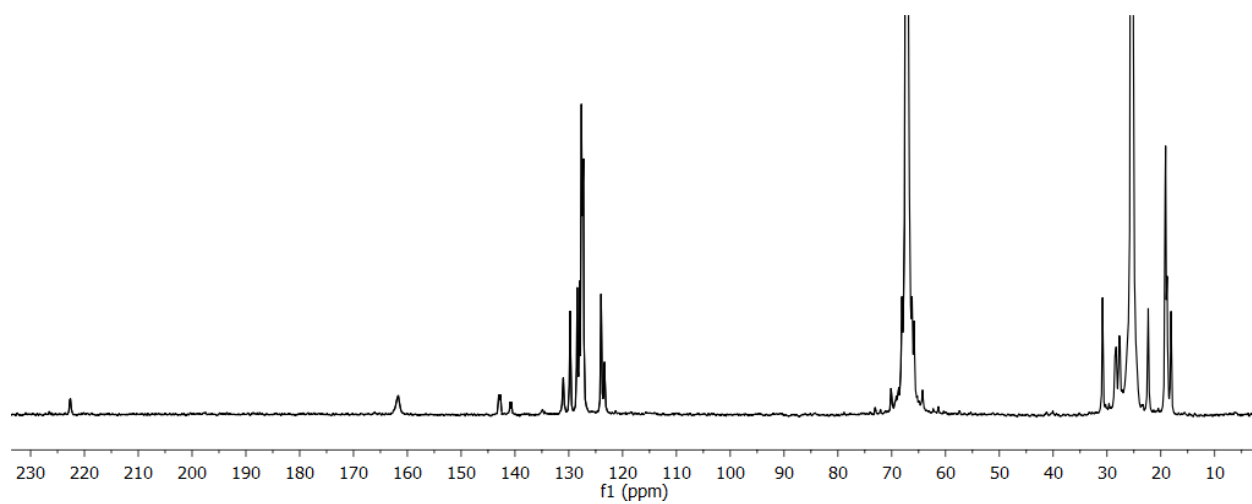

Fig. S26  $^{13}\text{C}$  NMR spectrum of **7**,  $(\text{TPB})(\mu\text{-H})\text{Fe}(\text{CO})(\text{H})$ , in  $\text{THF}/\text{C}_6\text{D}_6$ .

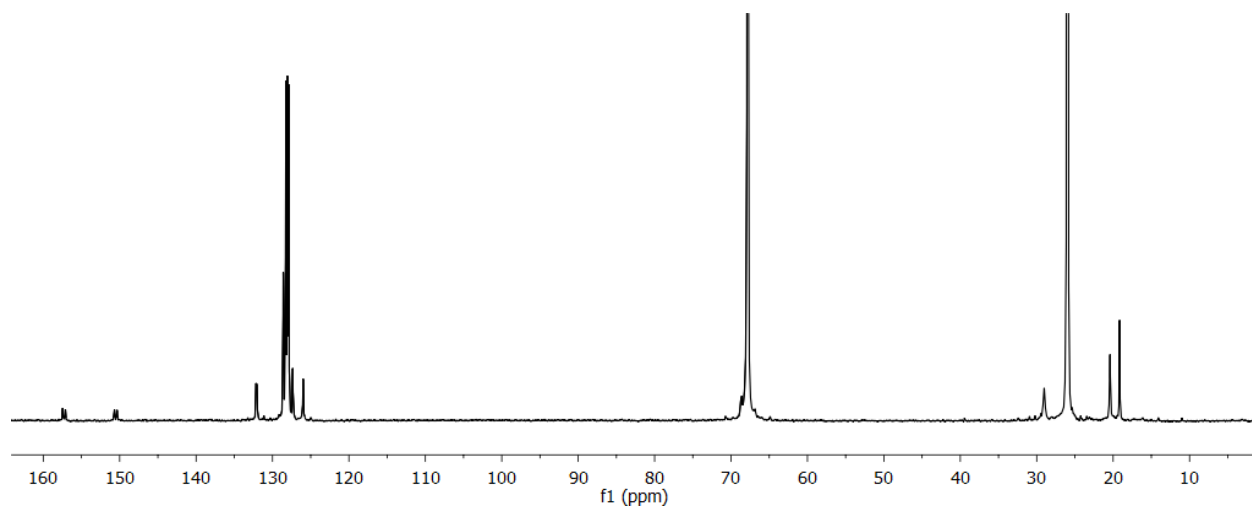

Fig. S27  $^{13}\text{C}$  NMR spectrum of  $(\text{SiP}^{i\text{Pr}}_3)\text{Fe}(\text{H}_2)(\text{H})$  in  $\text{THF}/\text{C}_6\text{D}_6$ .

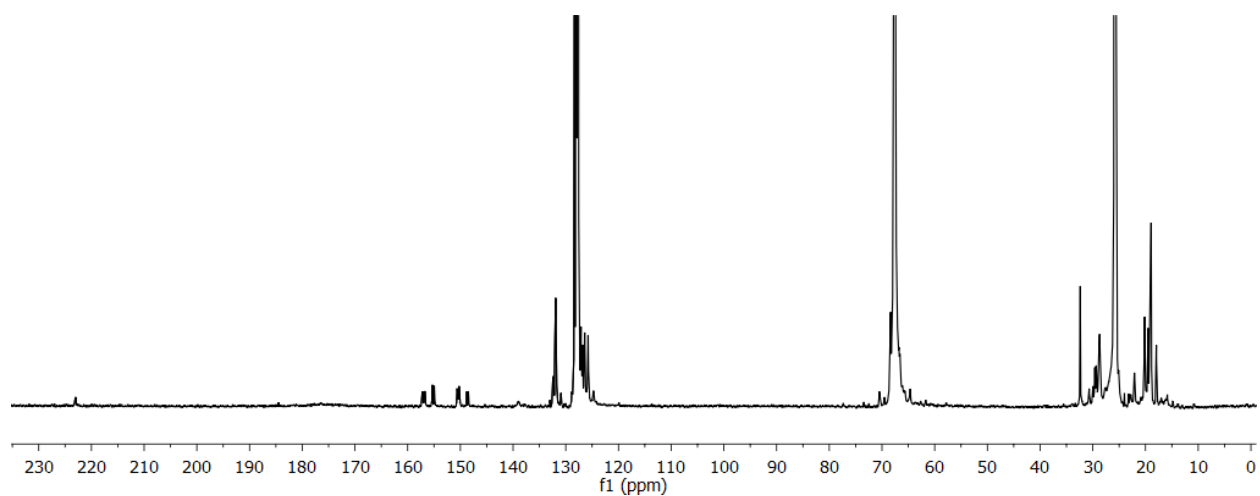

**Fig. S28**  $^{13}\text{C}$  NMR spectrum of  $(\text{SiP}^{\text{iPr}}_3)\text{Fe}(\text{CO})(\text{H})$  in THF/ $\text{C}_6\text{D}_6$ .

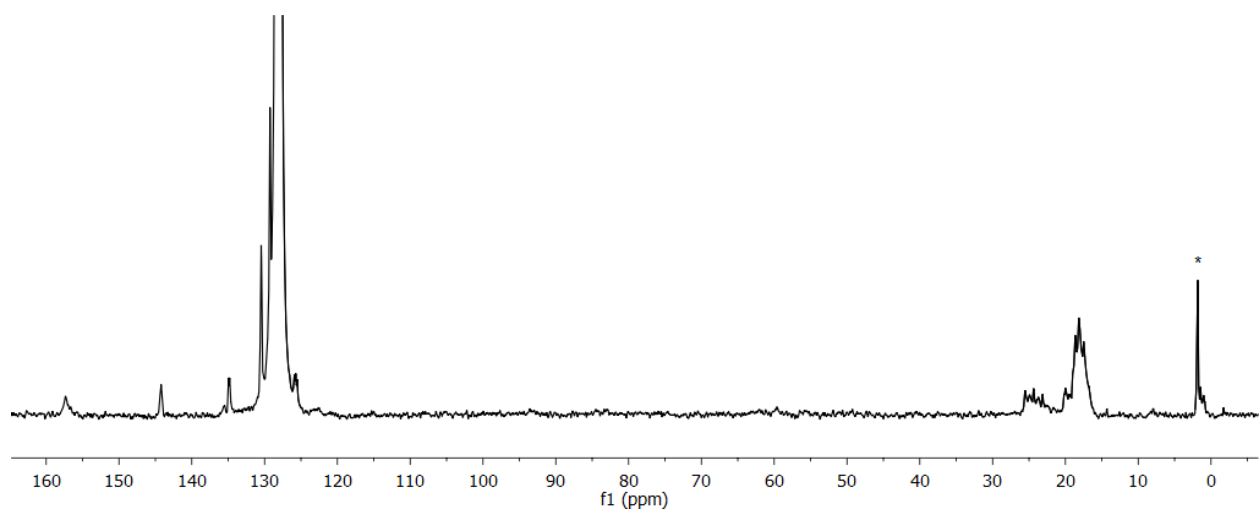

**Fig. S29.**  $^{13}\text{C}$  NMR spectrum of **11** in  $\text{C}_6\text{D}_6$ . \* Residual hexamethyldisiloxane.

## $^{11}\text{B}$ NMR Spectra

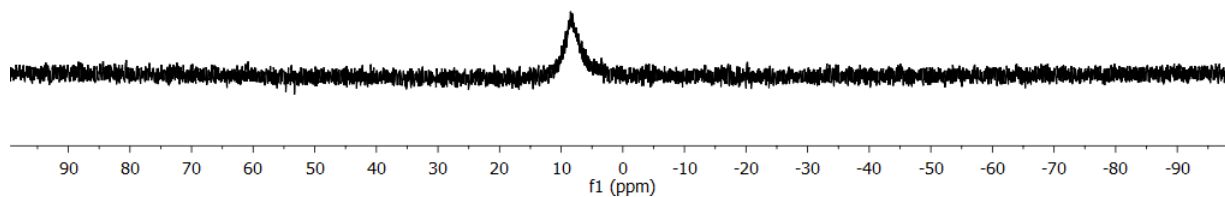

**Fig. S30**  $^{11}\text{B}$  NMR spectrum of **2**,  $(\text{TPB})(\mu\text{-H})\text{Fe}(\text{N}_2)(\text{H})$  in  $\text{C}_6\text{D}_6$ .

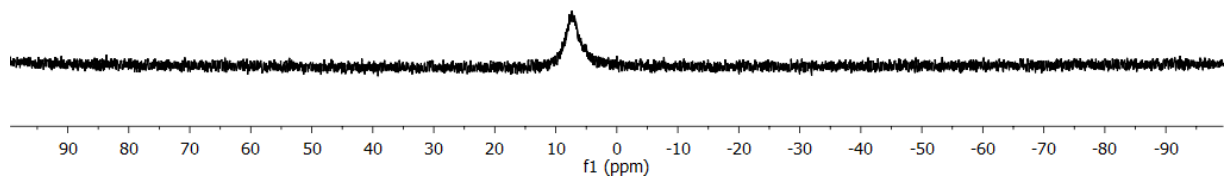

**Fig. S31**  $^{11}\text{B}$  NMR spectrum of **3**,  $(\text{TPB})(\mu\text{-H})\text{Fe}(\text{H}_2)(\text{H})$  in  $\text{C}_6\text{D}_6$ .

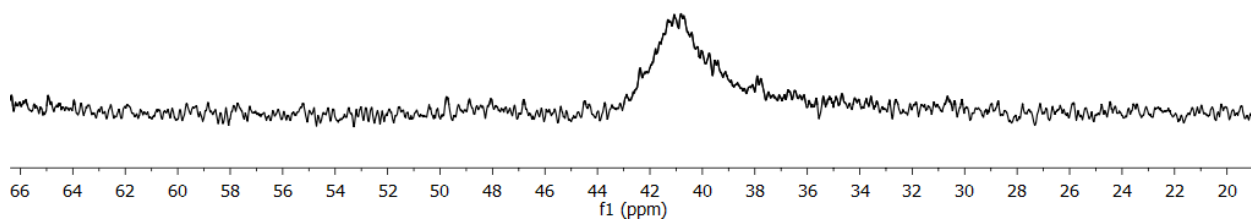

**Fig. S32**  $^{11}\text{B}$  NMR spectrum of **11** in  $\text{C}_6\text{D}_6$ .



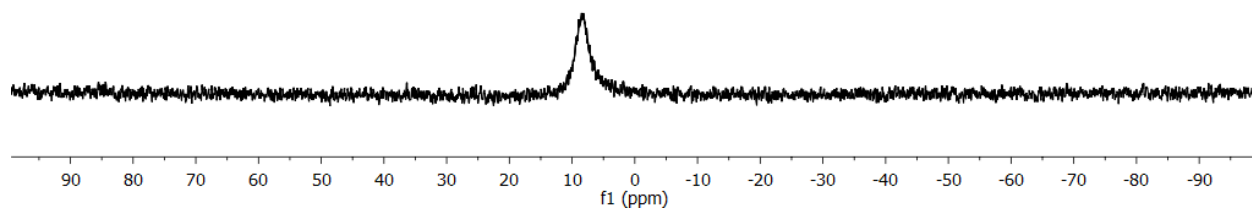

**Fig. S33**  $^{11}\text{B}$  NMR spectrum of **5**,  $(\text{TPB})(\mu\text{-H})\text{Fe}(\text{}^t\text{BuNC})(\text{H})$  in  $\text{C}_6\text{D}_6$ .

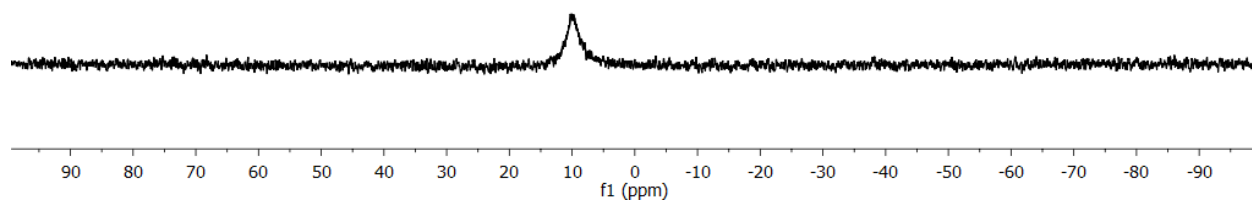

**Fig. S34**  $^{11}\text{B}$  NMR spectrum of **7**,  $(\text{TPB})(\mu\text{-H})\text{Fe}(\text{CO})(\text{H})$  in  $\text{C}_6\text{D}_6$ .

## Variable Temperature NMR

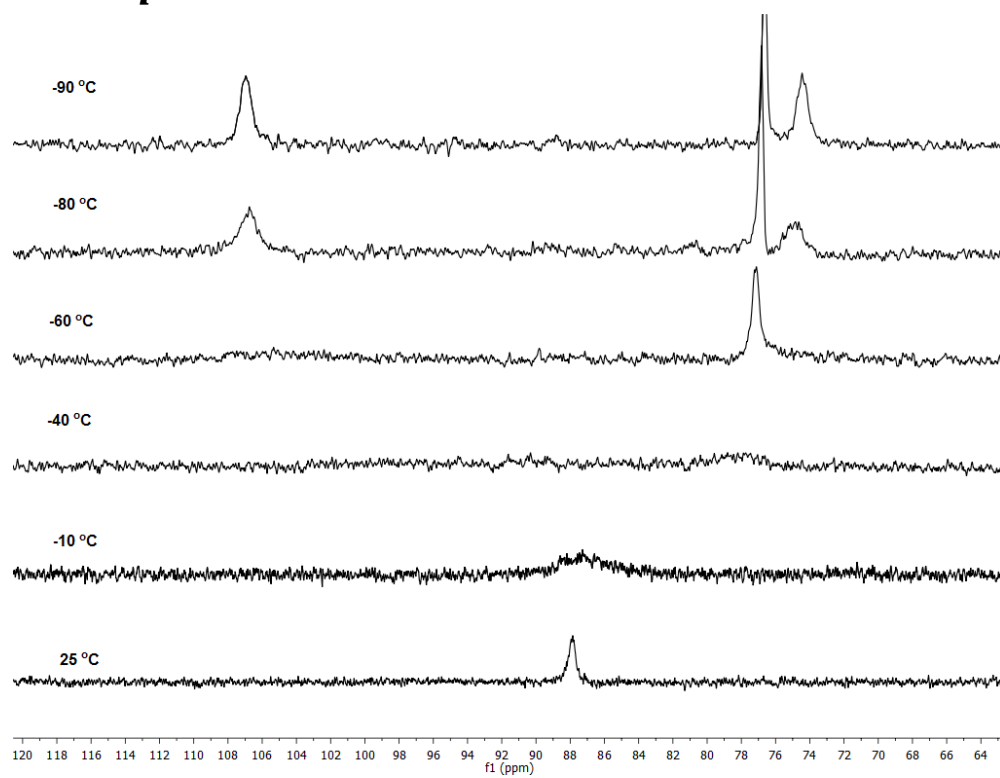

Fig. S35 VT  $^{31}\text{P}$  NMR spectra profile of **3** in  $d_8$ -toluene.

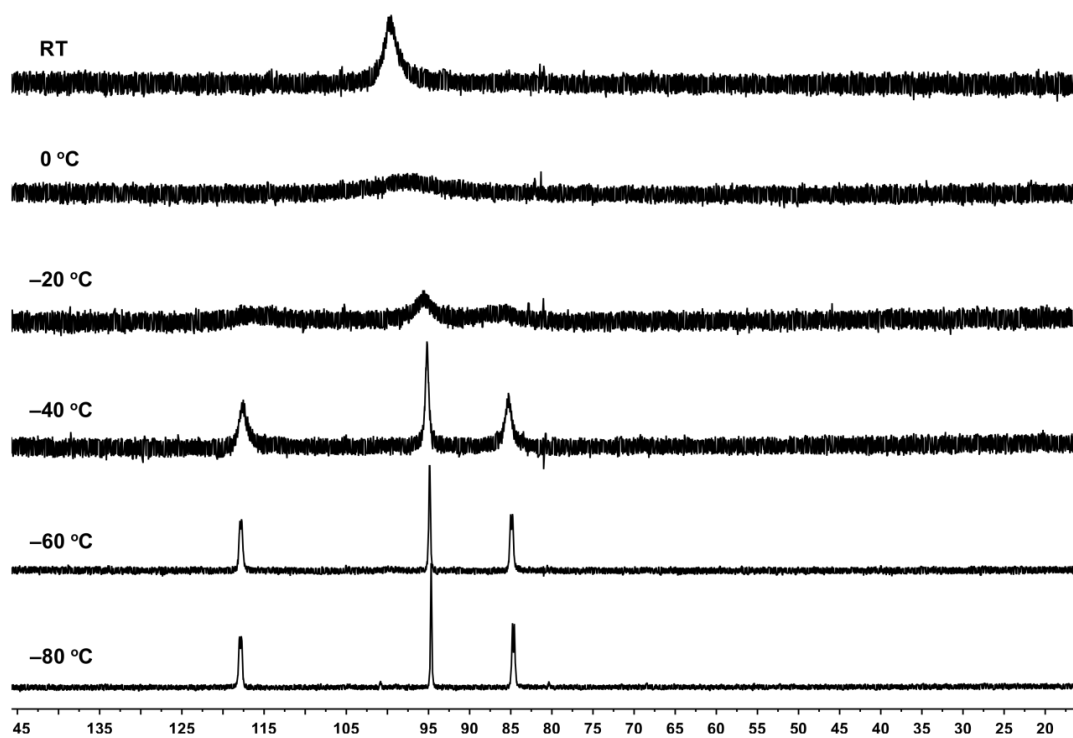

Fig. S36 VT  $^{31}\text{P}$  NMR spectra of  $(\text{SiP}^{\text{iPr}}_3)\text{Fe}(\text{H}_2)(\text{H})$  in  $d_8$ -toluene.

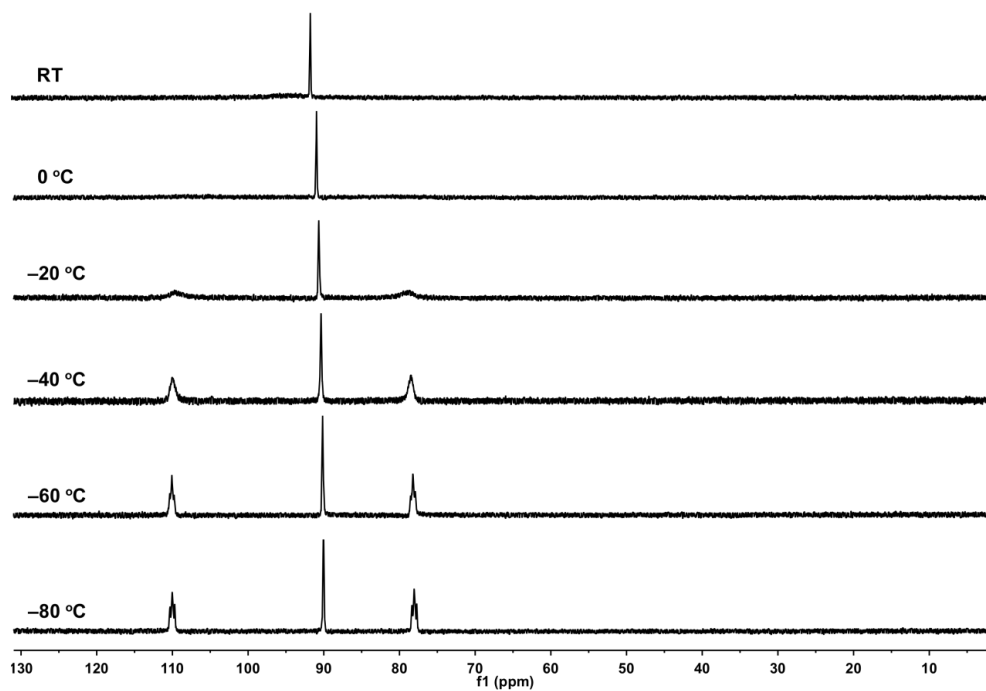

Fig. S37 VT  $^{31}\text{P}$  NMR spectra of  $(\text{SiP}^{\text{iPr}}_3)\text{Fe}(\text{CO})(\text{H})$  in  $d_8$ -toluene

## *T<sub>1min</sub> Measurements*

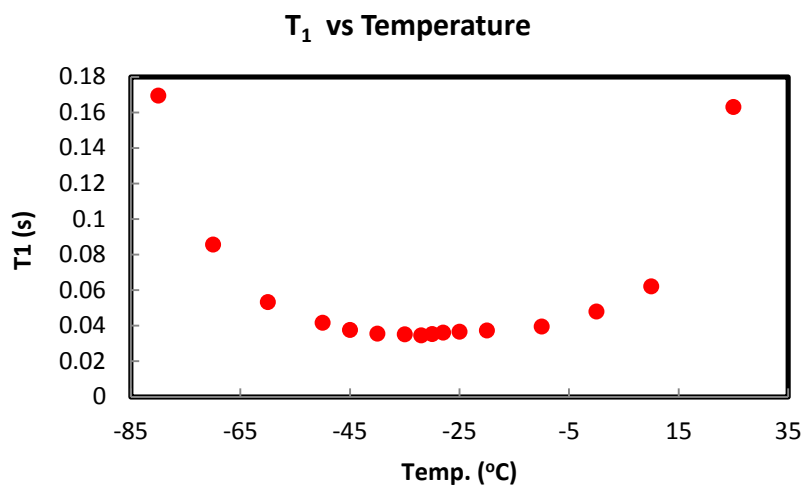

**Fig. S38** T<sub>1</sub> values for **3**, (TPB)(μ-H)Fe(H<sub>2</sub>)(H), in *d*<sub>8</sub>-toluene. T<sub>1min</sub> is 35 ms at -32 °C.

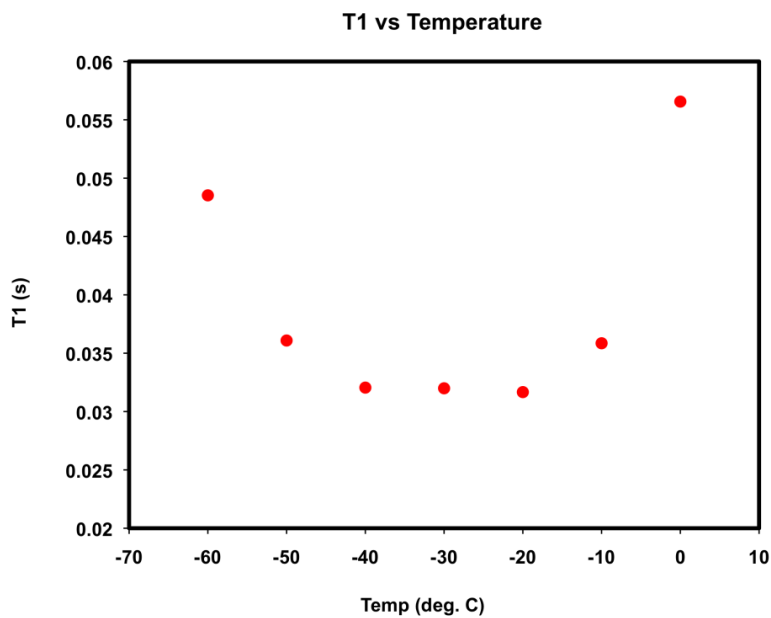

**Fig. S39** T<sub>1</sub> values for (SiP<sup>*i*Pr</sup><sub>3</sub>)Fe(H<sub>2</sub>)(H). The T<sub>1min</sub> is 32 ms in *d*<sub>8</sub>-toluene at -30 °C.

## *Miscellaneous NMR Data*

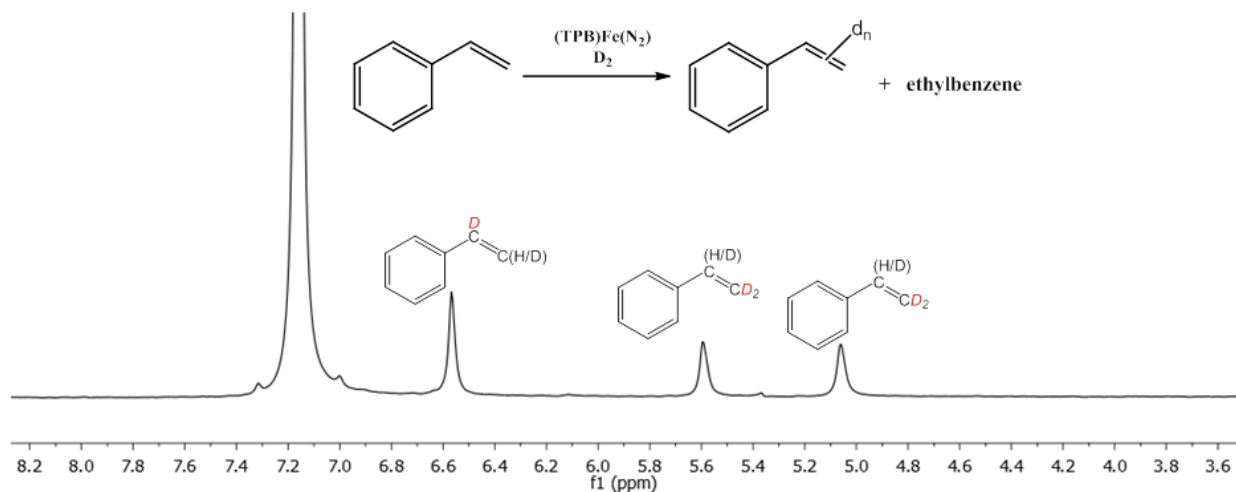

**Fig. S40**  $^2\text{H}$  NMR spectrum showing vinyl deuterated styrene arising from exchange of deuterium into styrene catalyzed by **1** under  $\text{D}_2$  (1 atm).

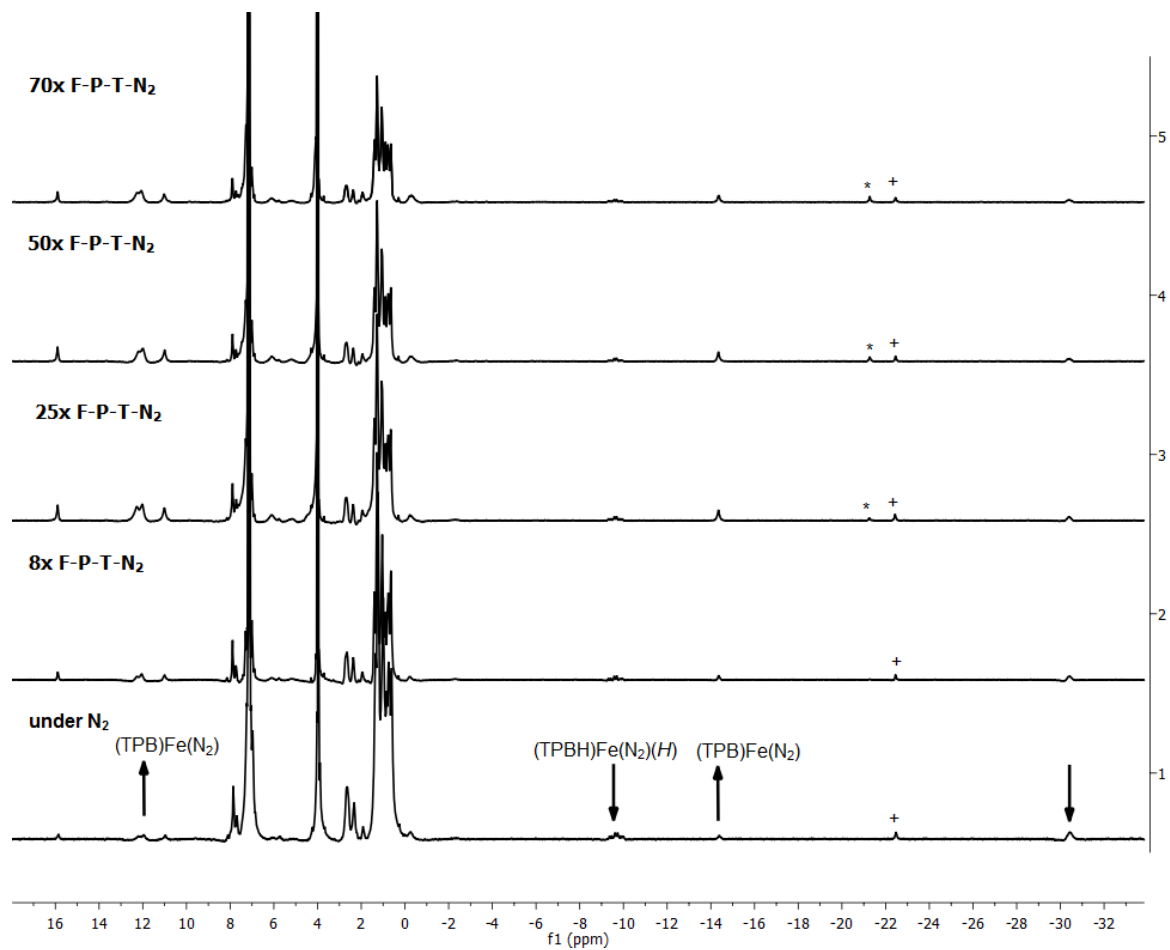

**Fig. S41** Elimination of  $\text{H}_2$  from **2**,  $(\text{TPB})(\mu\text{-H})\text{Fe}(\text{N}_2)(\text{H})$ . Iterative freeze-pump-thaw- $\text{N}_2$  cycles were performed to promote  $\text{H}_2$  release and reformation of **1**. Ferrocene ( $\delta$  4.0) was used as an

integration standard. <sup>+</sup>Residual (TPB)FeBr (previously reported). \*(TPB)FeCl, known decomposition product from **1**.

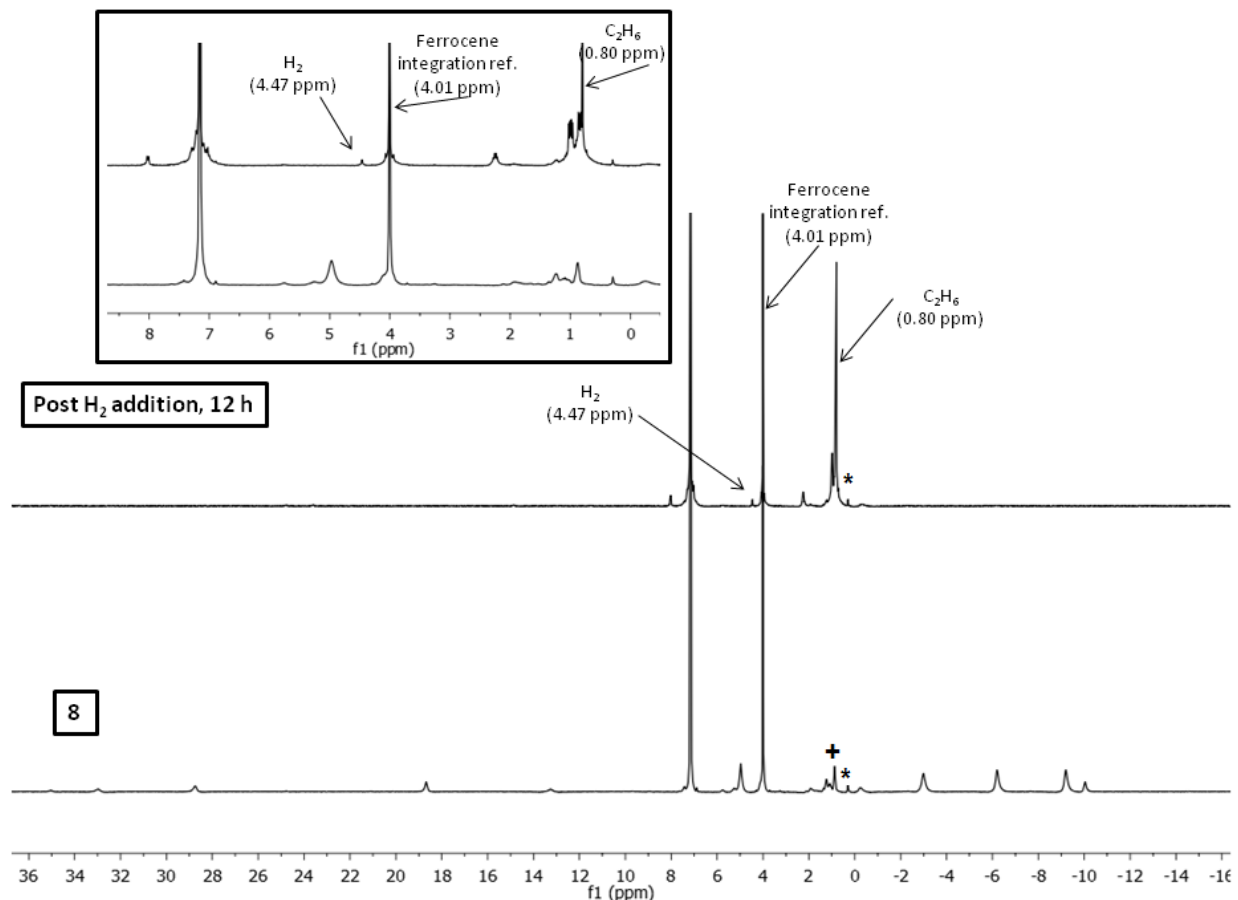

**Fig. S42** <sup>1</sup>H NMR spectra of the reaction between **8** and H<sub>2</sub> (1 atm). (bottom) Compound **8** formed from the addition of 1 equiv of ethylene to **1**. (top) The spectrum after H<sub>2</sub> addition (12 h) shows that the bound ethylene in **8** was hydrogenated to ethane. (inset) Enlargement of the same spectra. Ferrocene was used as an integration standard, and it was determined by integration that ethane was indeed formed in the reaction (0.8 equiv relative to **8** after subtracting the ethane introduced at the beginning of the reaction from the ethylene tank). \*Residual silicon grease. <sup>+</sup>Residual ethane from the ethylene gas cylinder

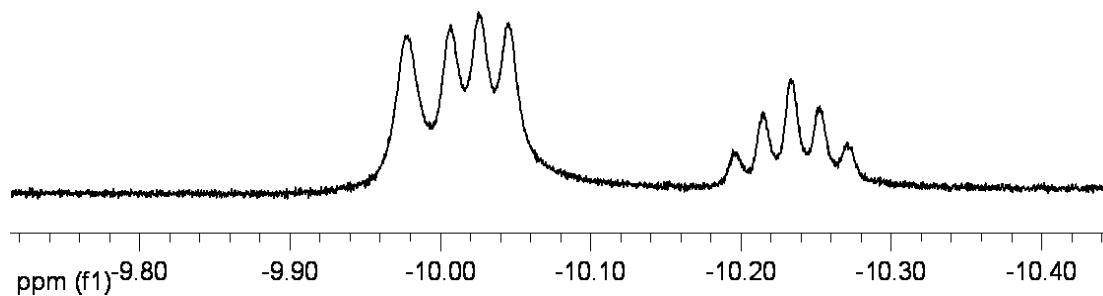

Fig. S43  $^1\text{H}\{^{31}\text{P}\}$  NMR spectrum of  $(\text{SiP}^{i\text{Pr}}_3)\text{Fe}(\text{H}_2)(\text{H})$ -HD isotopomers in  $d_8$ -toluene at 293 K.

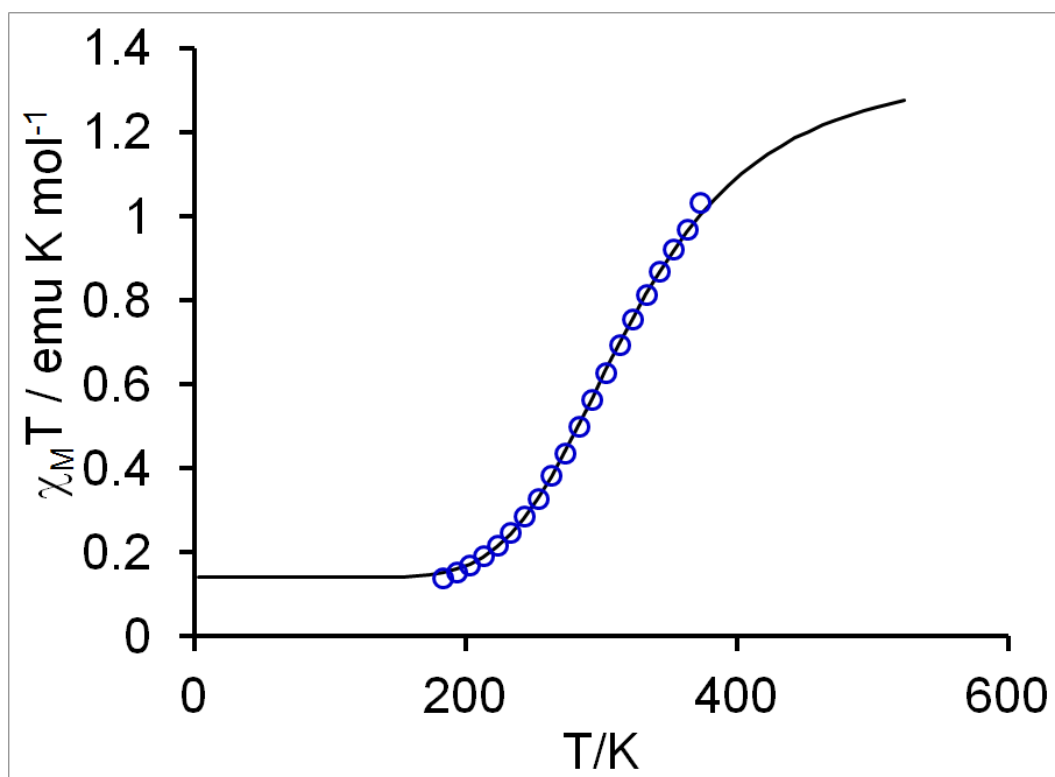

Fig. S44 VT magnetic susceptibility measurements (method of Evans) of **4**,  $(\text{TPB})\text{Fe}(\text{CN}^t\text{Bu})$ .

## IR Spectra

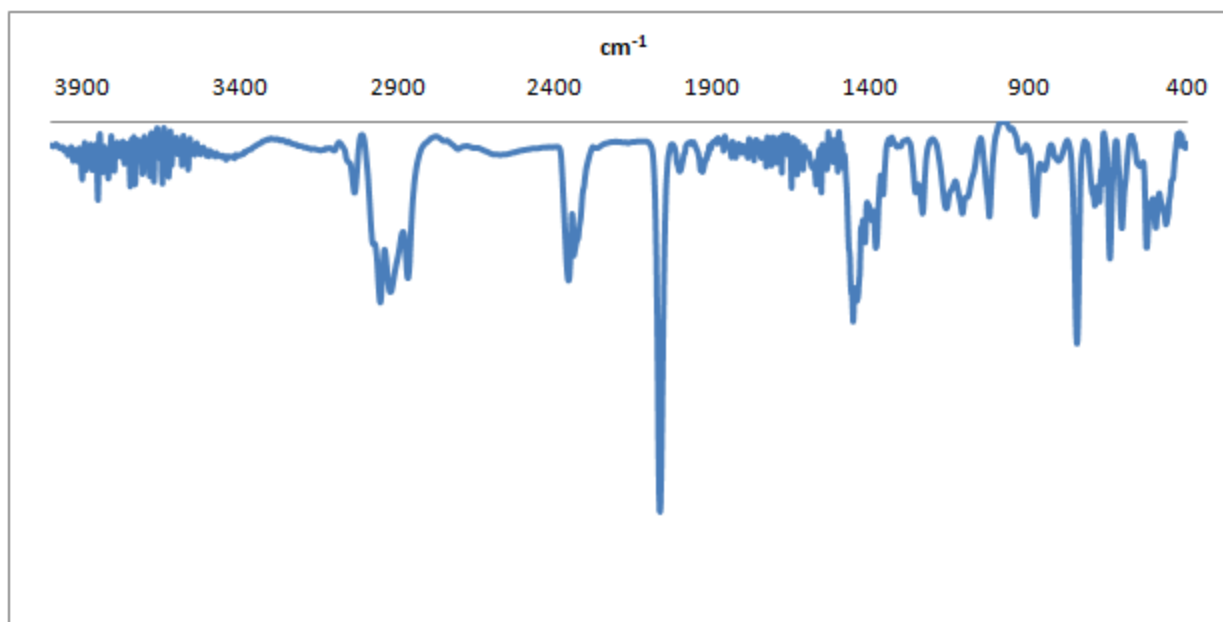

**Fig. S45** FT-IR (KBr) of **2**, (TPB)( $\mu$ -H)Fe(N<sub>2</sub>)(H).

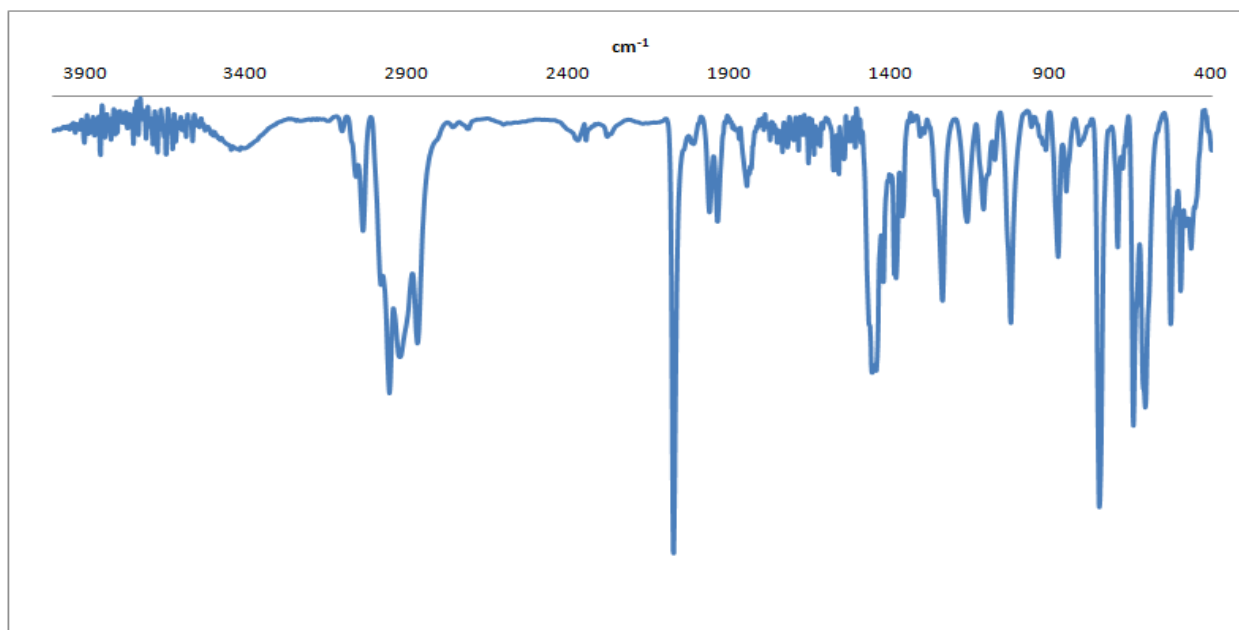

**Fig. S46** FT-IR (KBr) of **3**, (TPB)( $\mu$ -H)Fe(H<sub>2</sub>)(H).



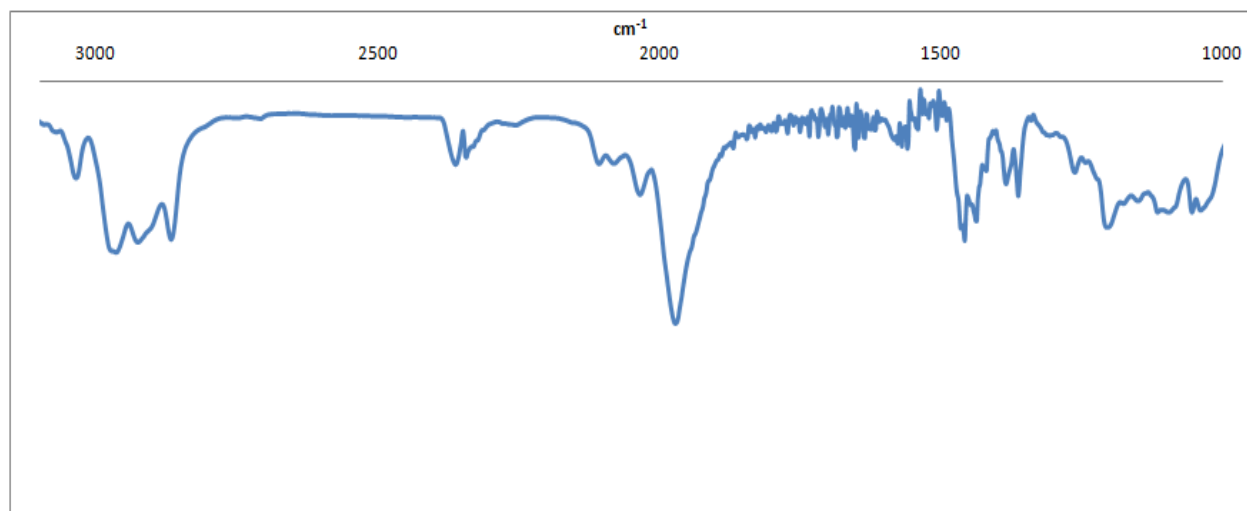

**Fig. S47** IR (KBr) spectrum of **4**, (TPB)Fe(CN<sup>t</sup>Bu).

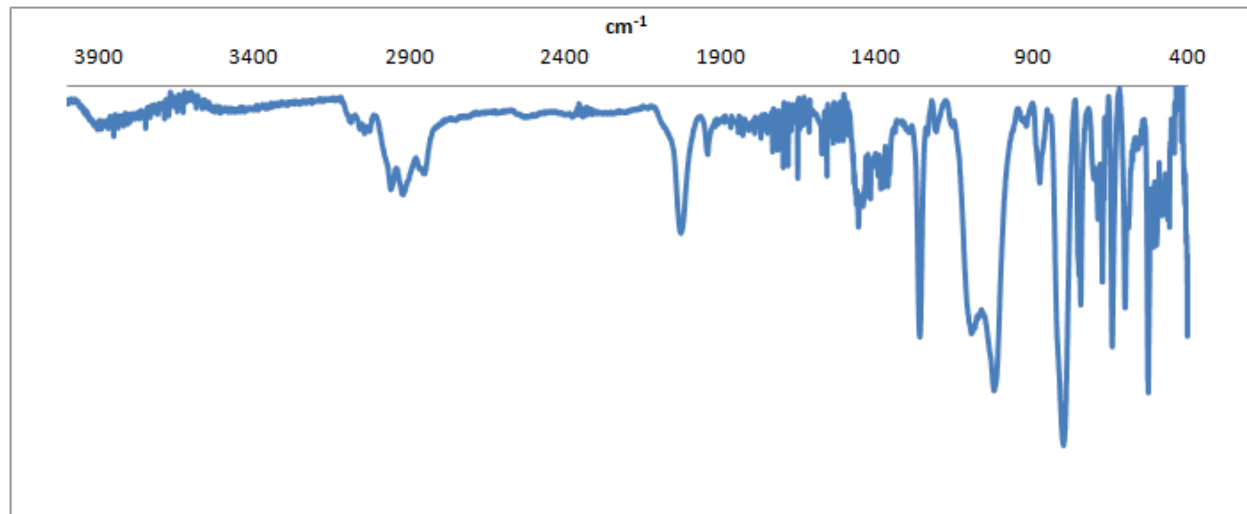

**Fig. S48** IR (KBr) spectrum of **5**, (TPB)( $\mu$ -H)Fe(CN<sup>t</sup>Bu)(H).

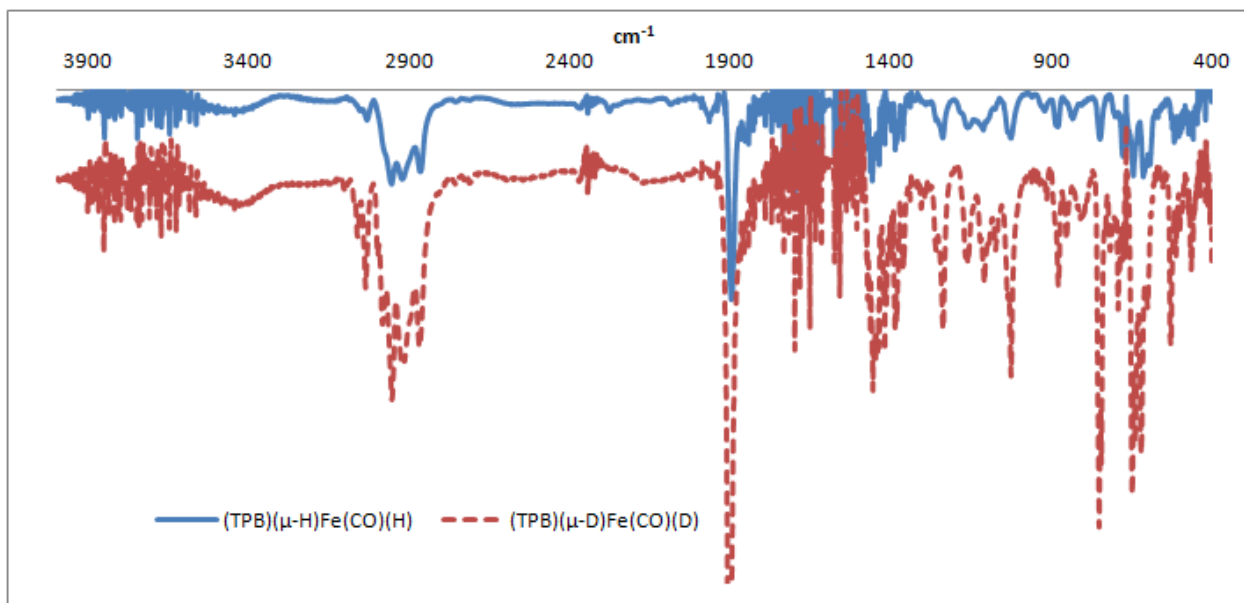

**Fig. S49** FT-IR (KBr) spectra for **7**, (TPB)( $\mu$ -H)Fe(CO)(H) and labeled (TPB)( $\mu$ -D)Fe(CO)(D).

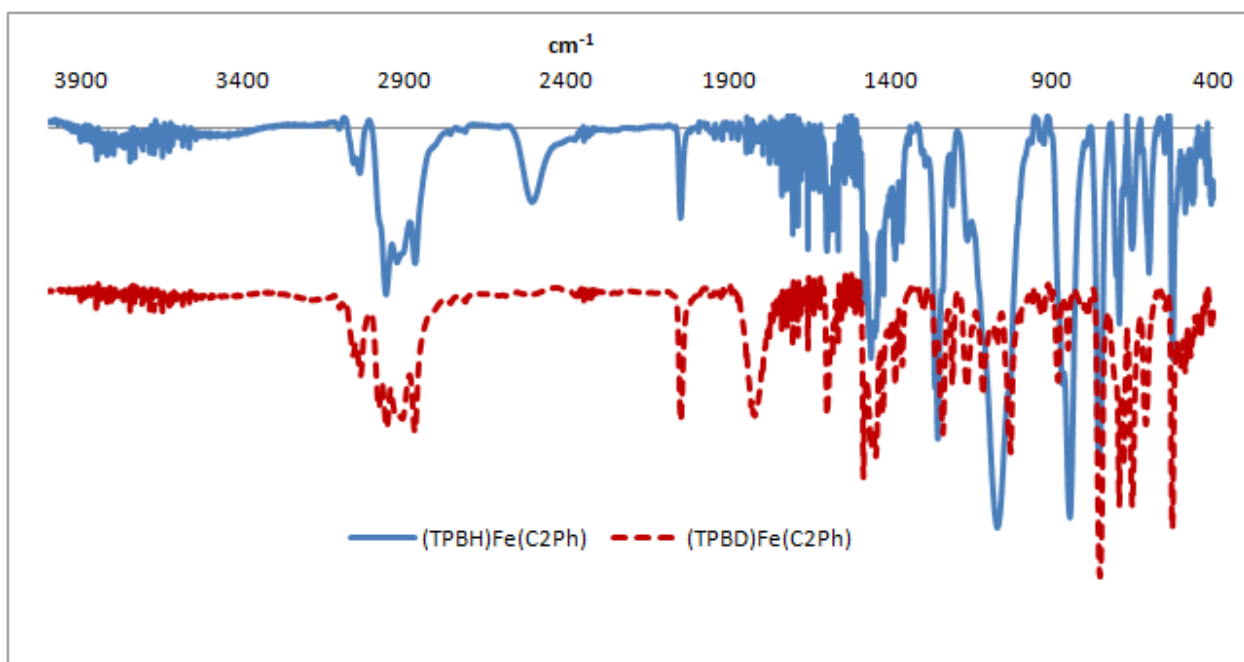

**Fig. S50** FT-IR (KBr) spectra for **9**, (TPBH)Fe(C $\equiv$ CPh) and labeled (TPBD)Fe(C $\equiv$ CPh).

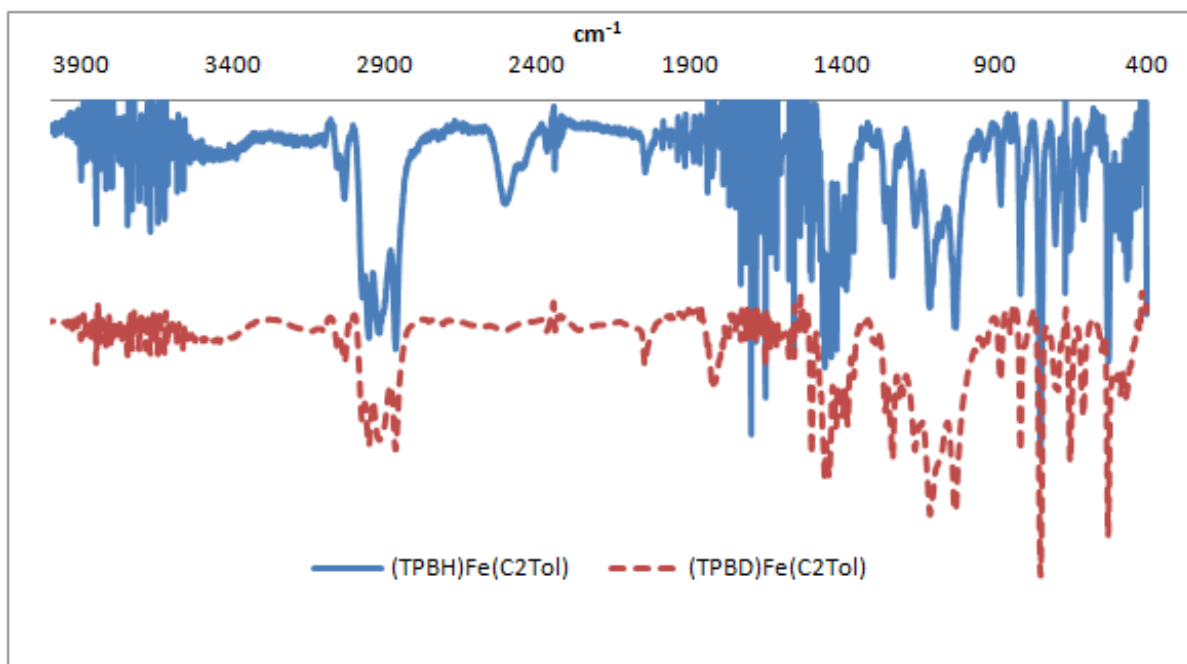

**Fig. S51** FT-IR (KBr) of **10**,  $(\text{TPBH})\text{Fe}(\text{C}\equiv\text{CTol})$ , and labeled  $(\text{TPBD})\text{Fe}(\text{C}\equiv\text{CTol})$ .

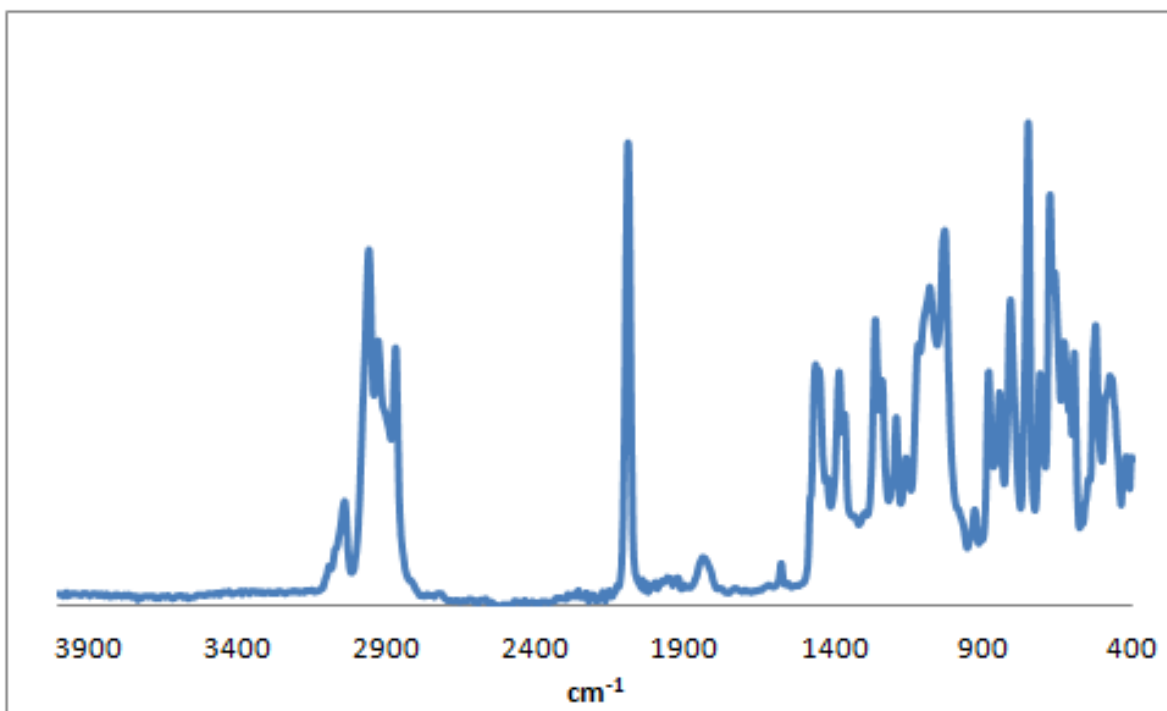

**Fig. S52** ATR-IR (THF thin film) of **11**.

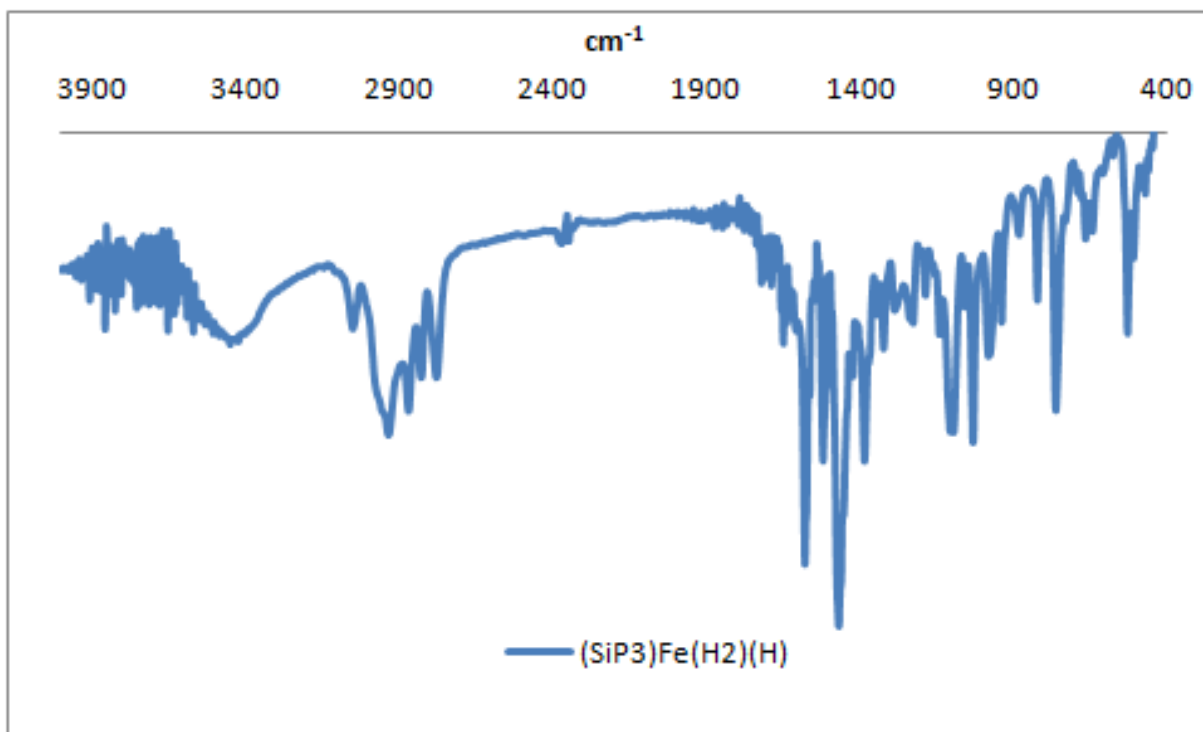

Fig. S53 FT-IR (KBr) of  $(\text{SiP}^{\text{iPr}_3})\text{Fe}(\text{H}_2)(\text{H})$ .

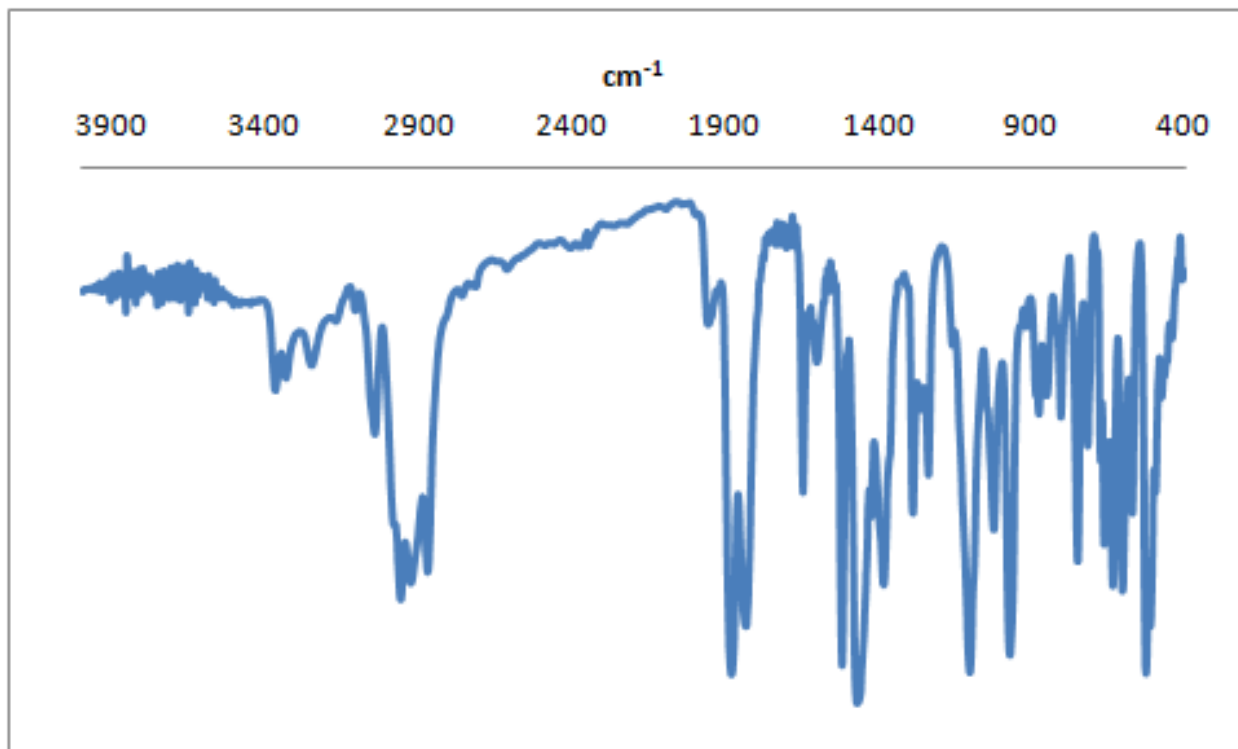

Fig. S54 FT-IR (KBr) of  $(\text{SiP}^{\text{iPr}_3})\text{Fe}(\text{CO})(\text{H})$ .

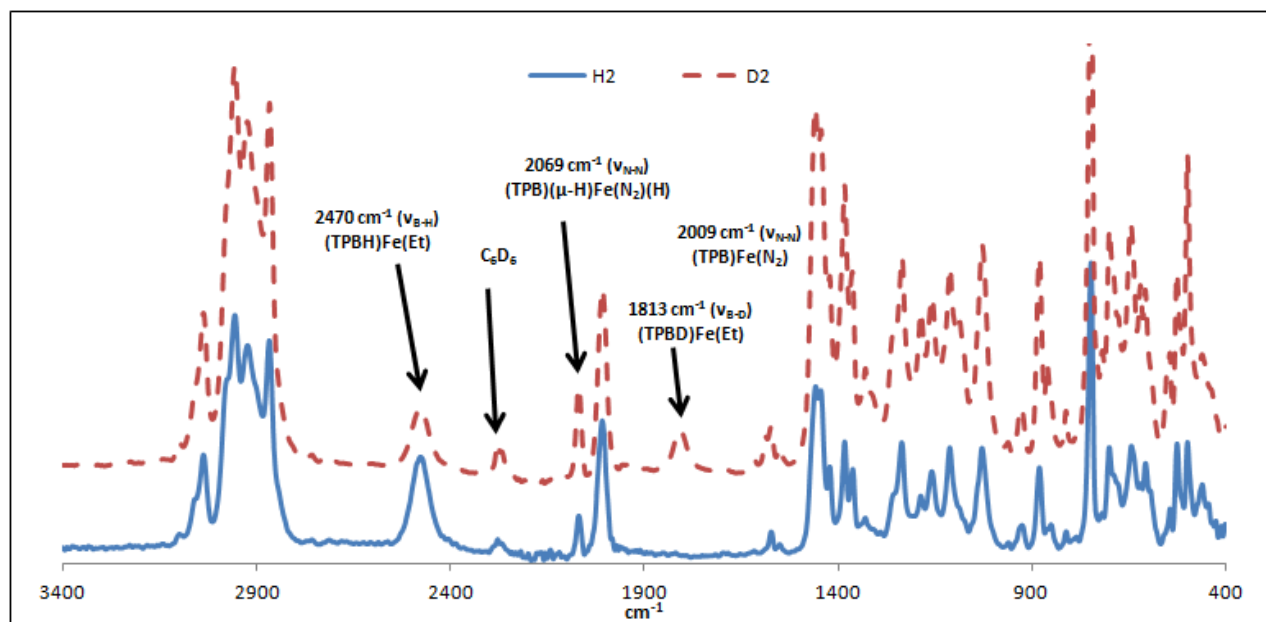

**Fig. S55** ATR-IR (THF thin film) of **A** (TPBH)Fe(Et) ( $H_2$ ) and labeled (TPBD)Fe(Et) ( $D_2$ ).

## UV-Vis Spectra

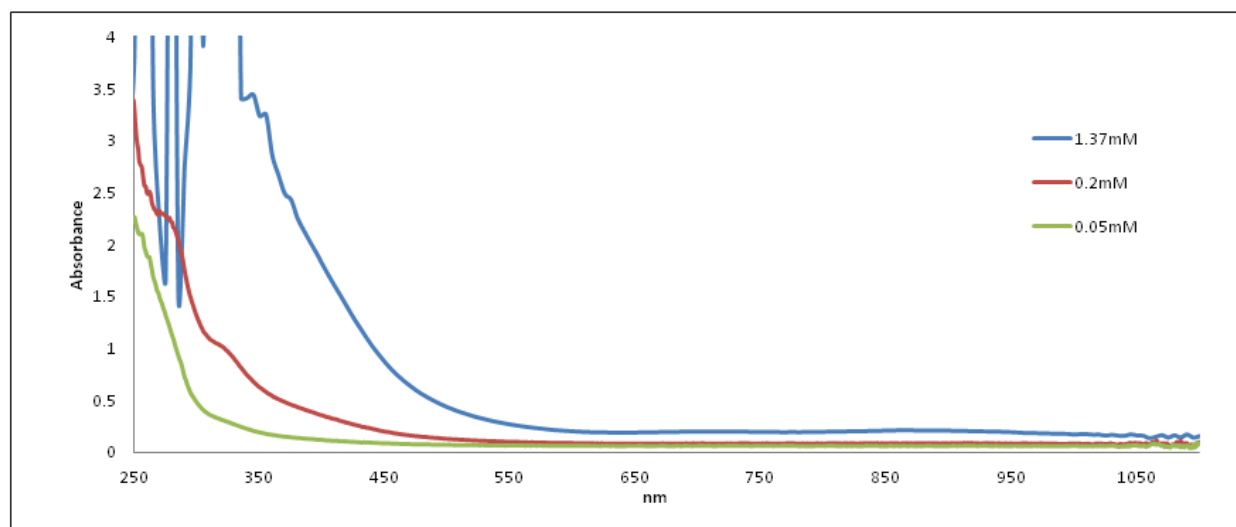

**Fig. S56** UV-Vis of **2**, (TPB)( $\mu$ -H)Fe( $N_2$ )(H), in THF.

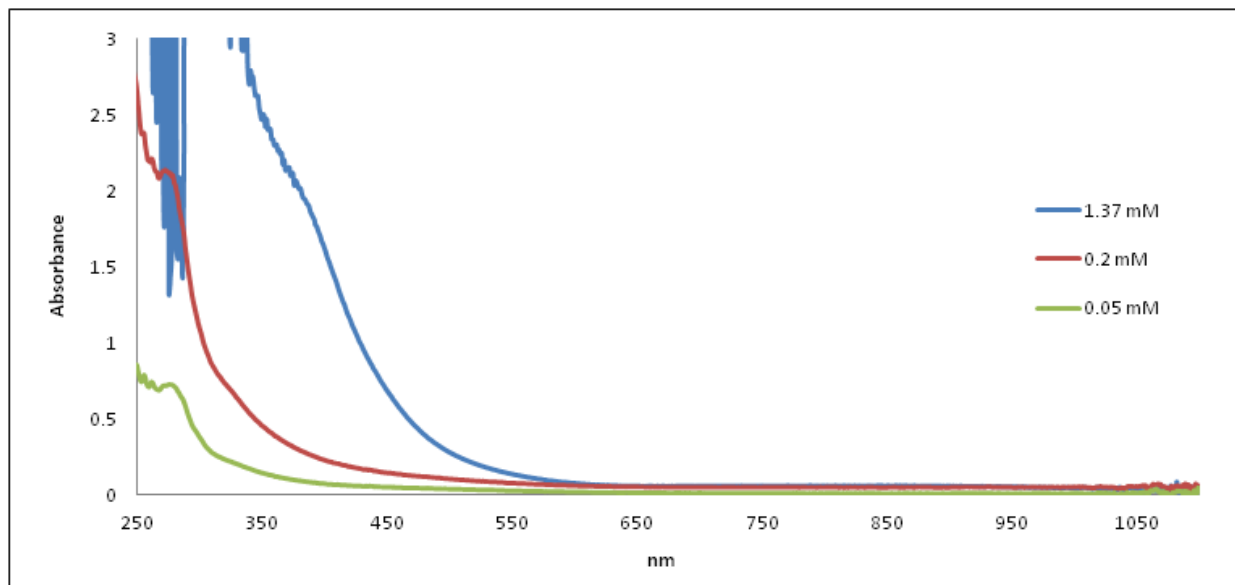

**Fig. S57** UV-Vis spectrum of **3**, (TPB)( $\mu$ -H)Fe(H<sub>2</sub>)(H), in THF.

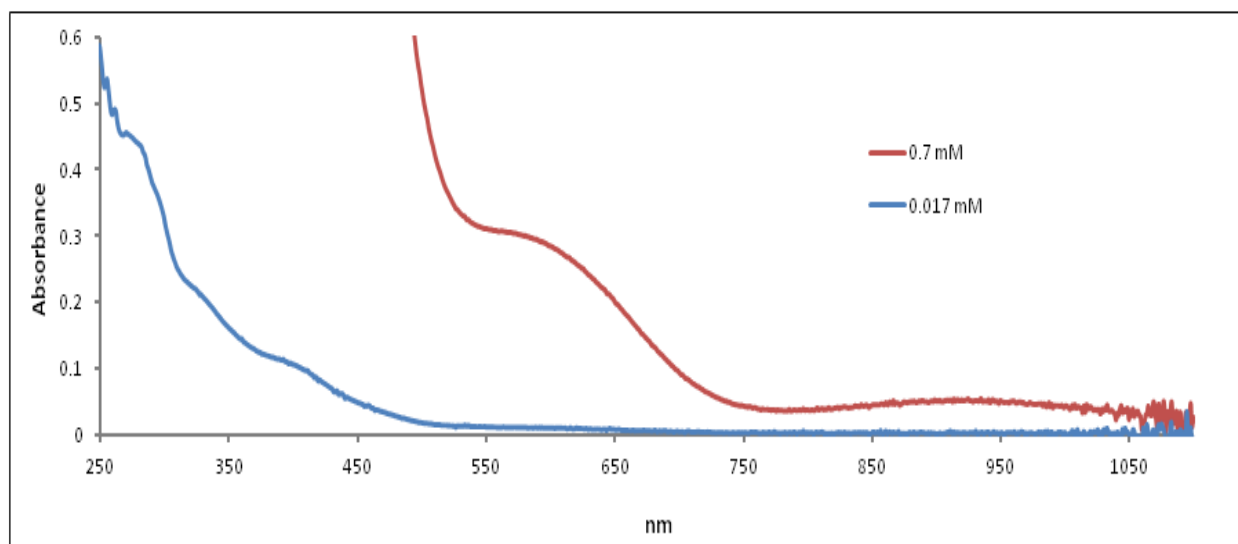

**Fig. S58** UV-vis spectrum of **4**, (TPB)Fe(CN<sup>t</sup>Bu), in THF.

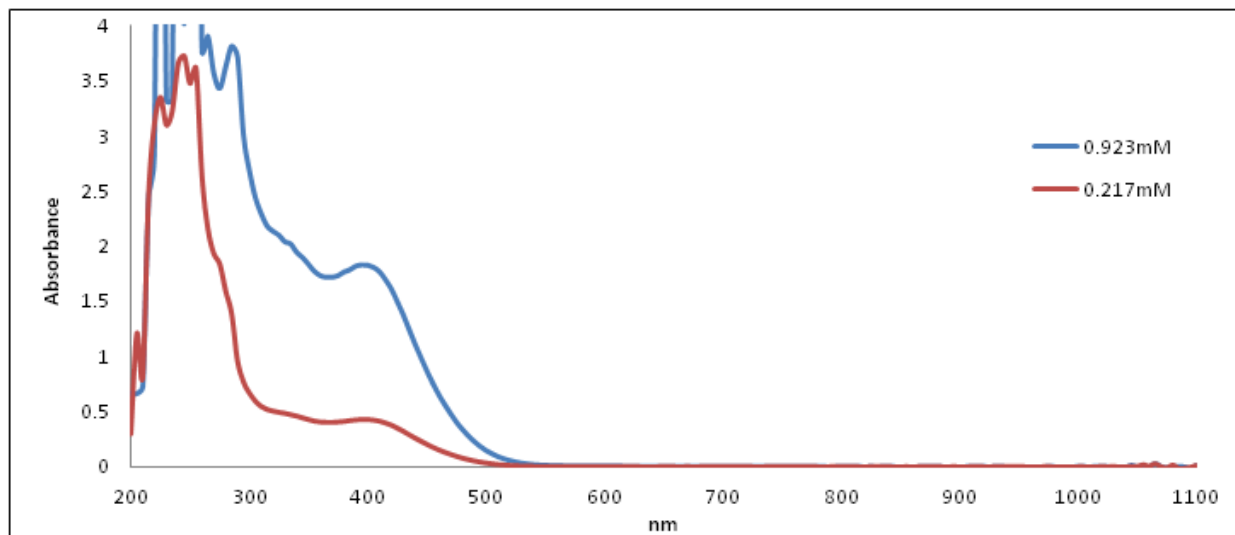

**Fig. S59** UV-Vis spectrum of **5**, (TPB)( $\mu$ -H)Fe(CN<sup>t</sup>Bu)(H), in THF.

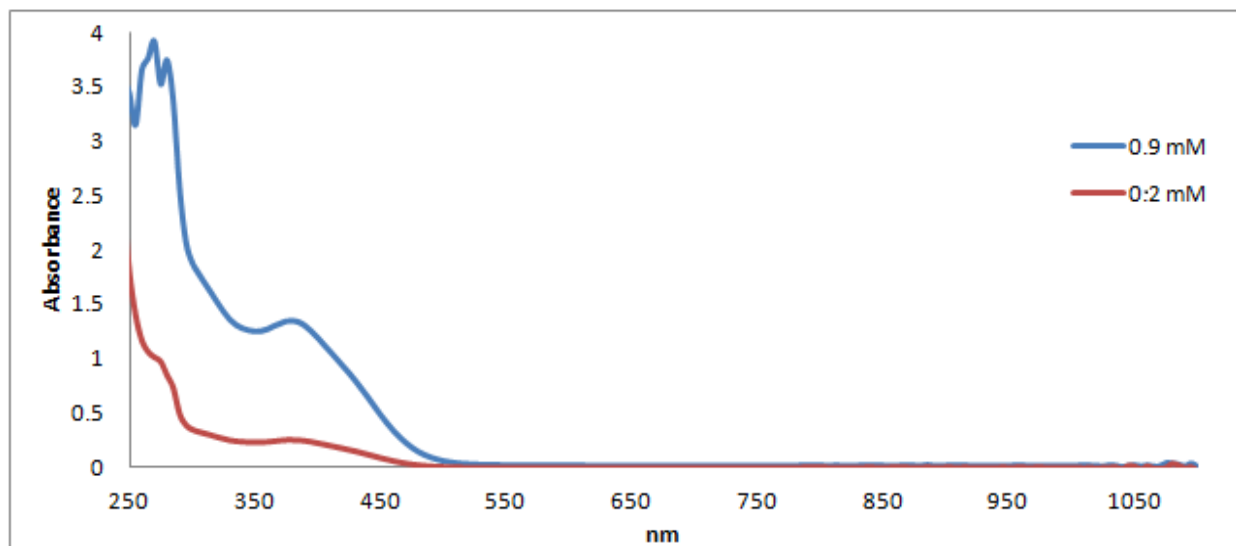

**Fig. S60** UV-Vis spectrum of **7**, (TPB)( $\mu$ -H)Fe(CO)(H), in THF.

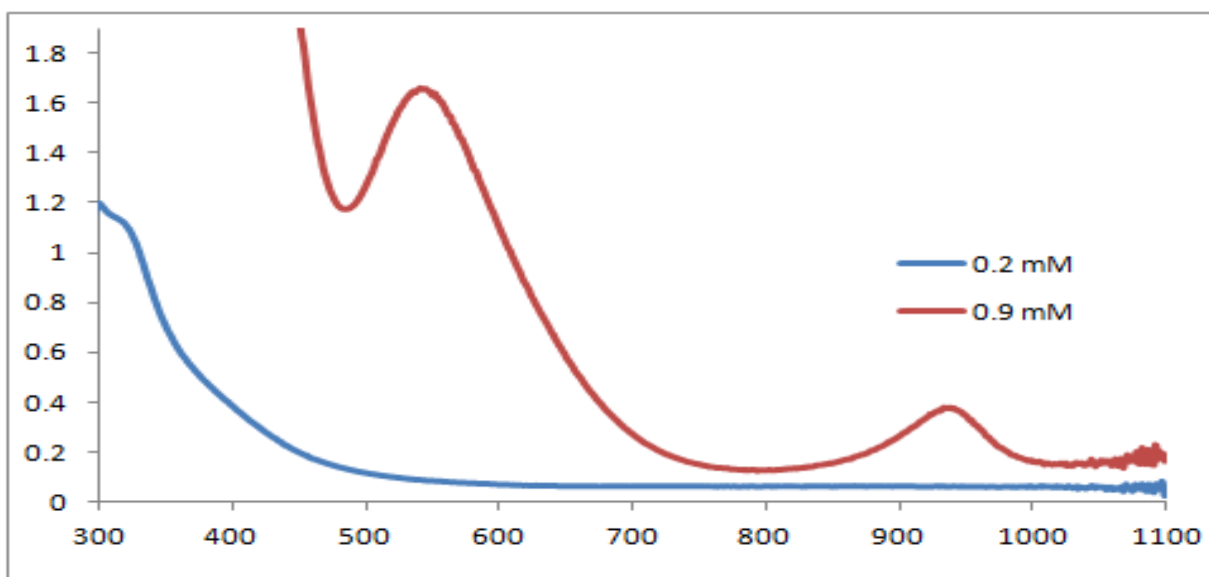

**Fig. S61** UV-Vis spectrum of **8**,  $(\text{TPB})\text{Fe}(\text{C}_2\text{H}_4)$ , in THF.

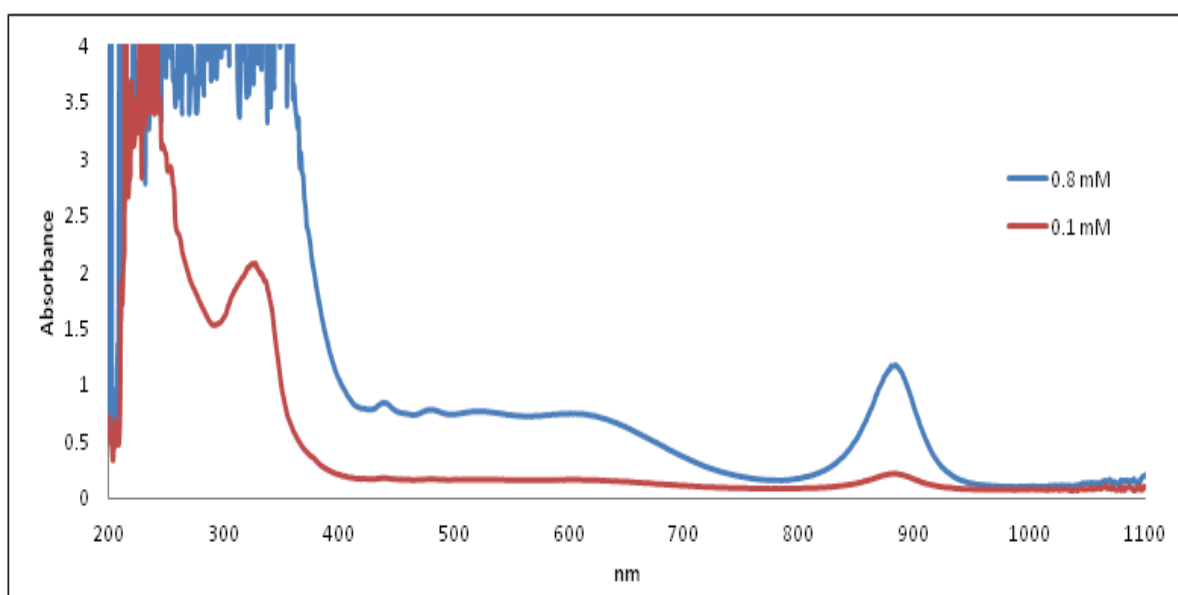

**Fig. S62** UV-Vis spectrum of **9**,  $(\text{TPB})(\mu\text{-H})\text{Fe}(\text{C}\equiv\text{CPh})$ , in THF.



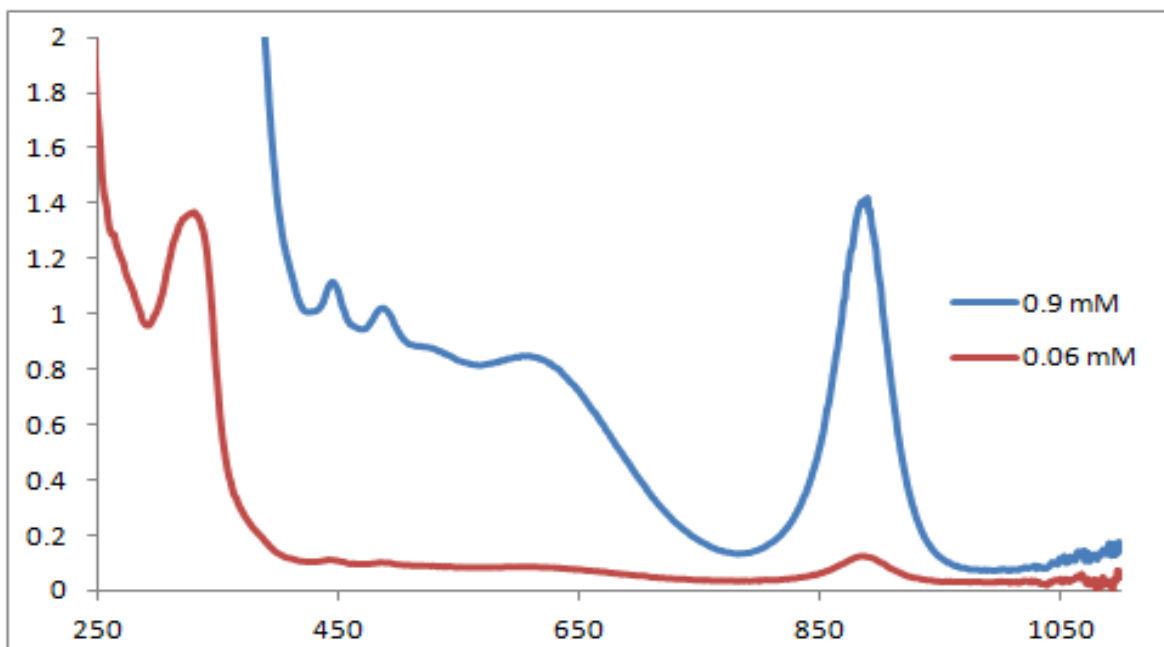

**Fig. S63** UV-Vis spectrum of **10**, (TPB)( $\mu$ -H)Fe(C $\equiv$ CTol), in THF.

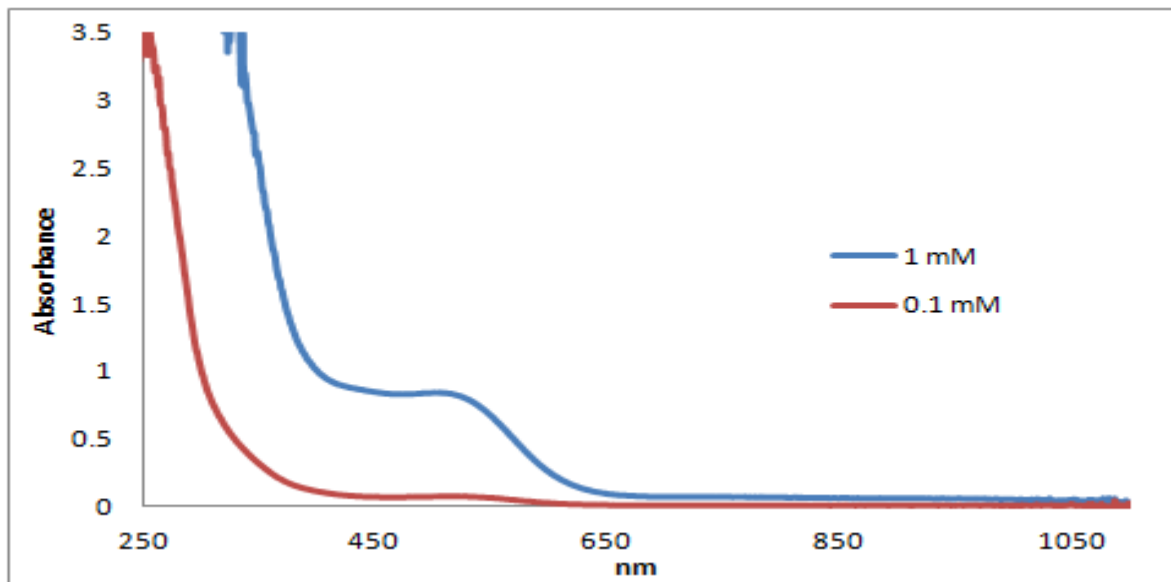

**Fig. S64** UV-Vis spectrum of **11** in THF.

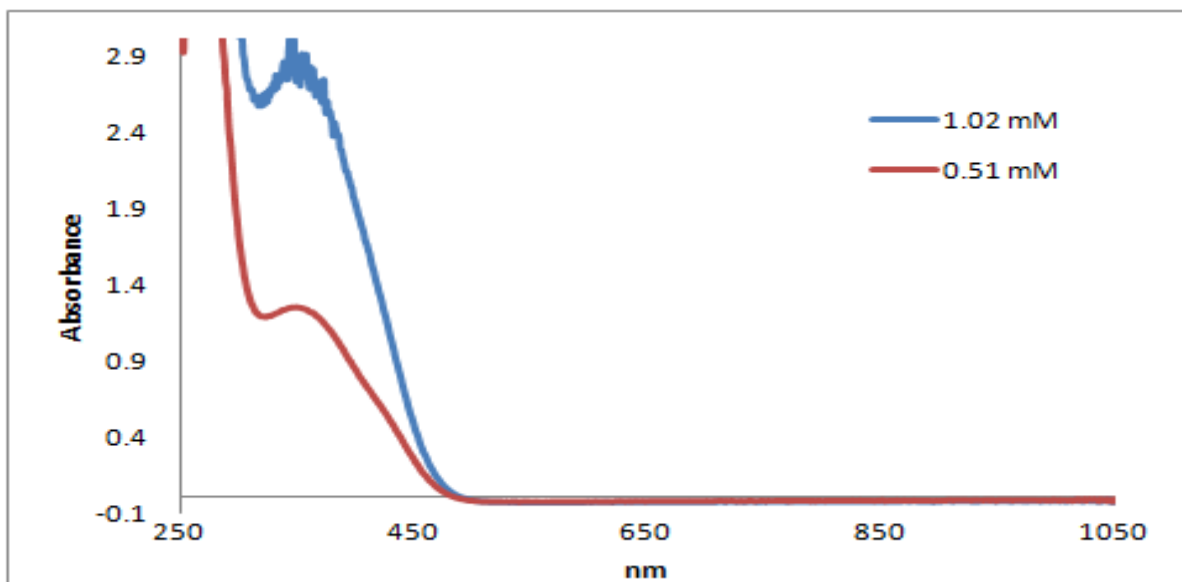

Fig. S65 UV-Vis spectrum of  $(\text{SiP}^{\text{iPr}}_3)\text{Fe}(\text{H}_2)(\text{H})$  in THF.

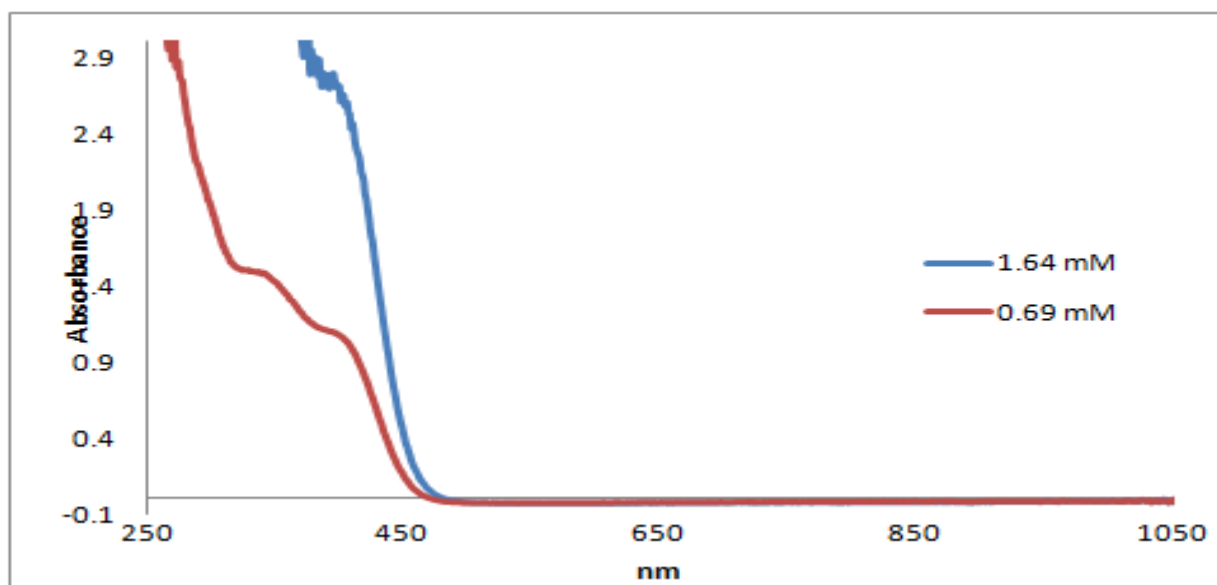

Fig. S66 UV-Vis spectrum of  $(\text{SiP}^{\text{iPr}}_3)\text{Fe}(\text{CO})(\text{H})$  in THF.

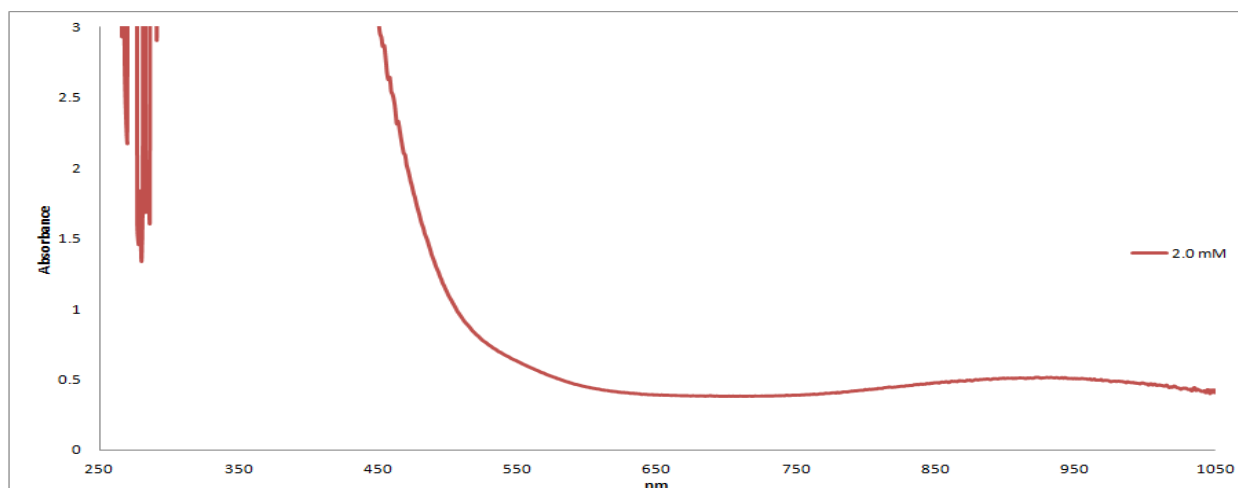

**Fig. S67** UV-Vis spectrum of **A**, (TPBH)Fe(Et), in THF.

## Catalytic Hydrogenation Time Traces

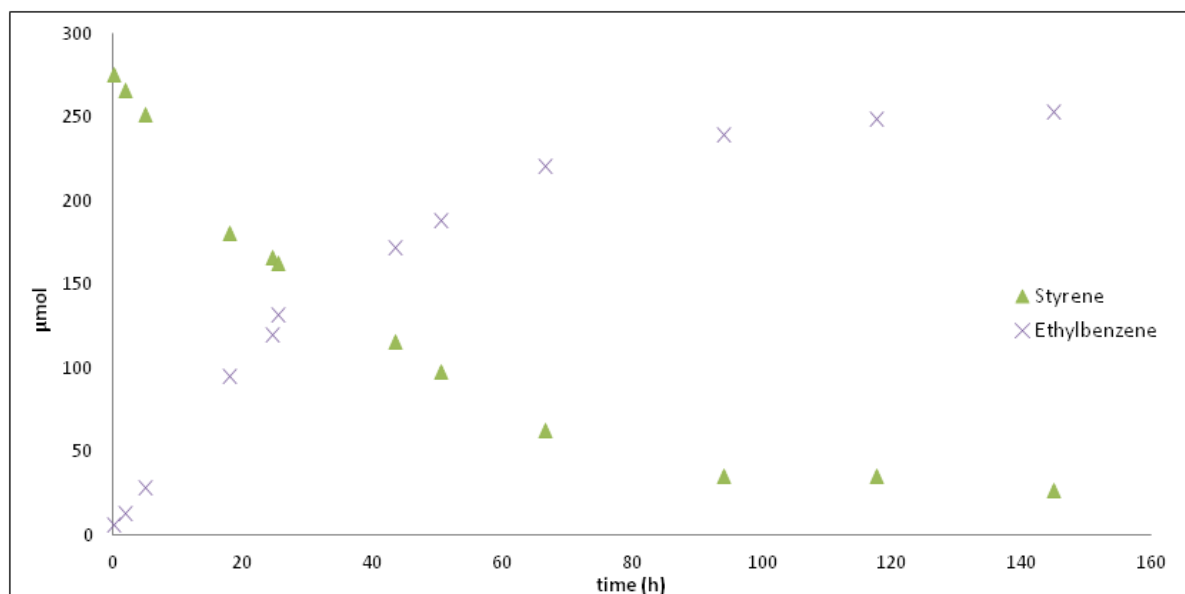

**Fig. S68** Catalytic hydrogenation of styrene with **1**. Amounts of styrene and ethylbenzene were determined by  $^1\text{H}$  NMR spectroscopy with ferrocene as an integration standard.

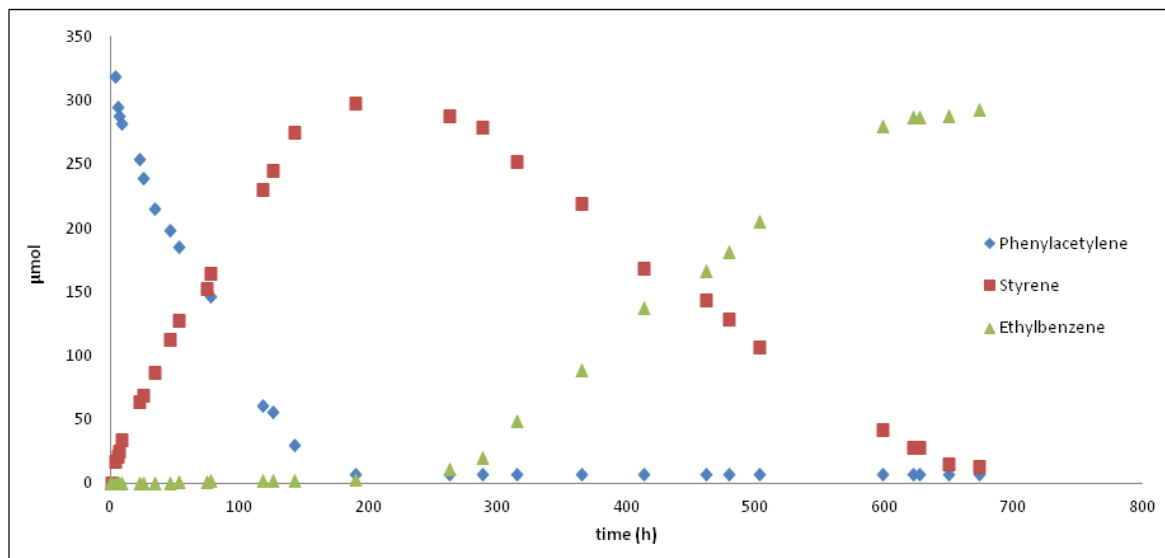

**Fig. S69** Catalytic hydrogenation of phenylacetylene with **1**. Amounts of phenylacetylene, styrene, and ethylbenzene were determined by  $^1\text{H}$  NMR spectroscopy with ferrocene as an integration standard.

## GC-MS Data

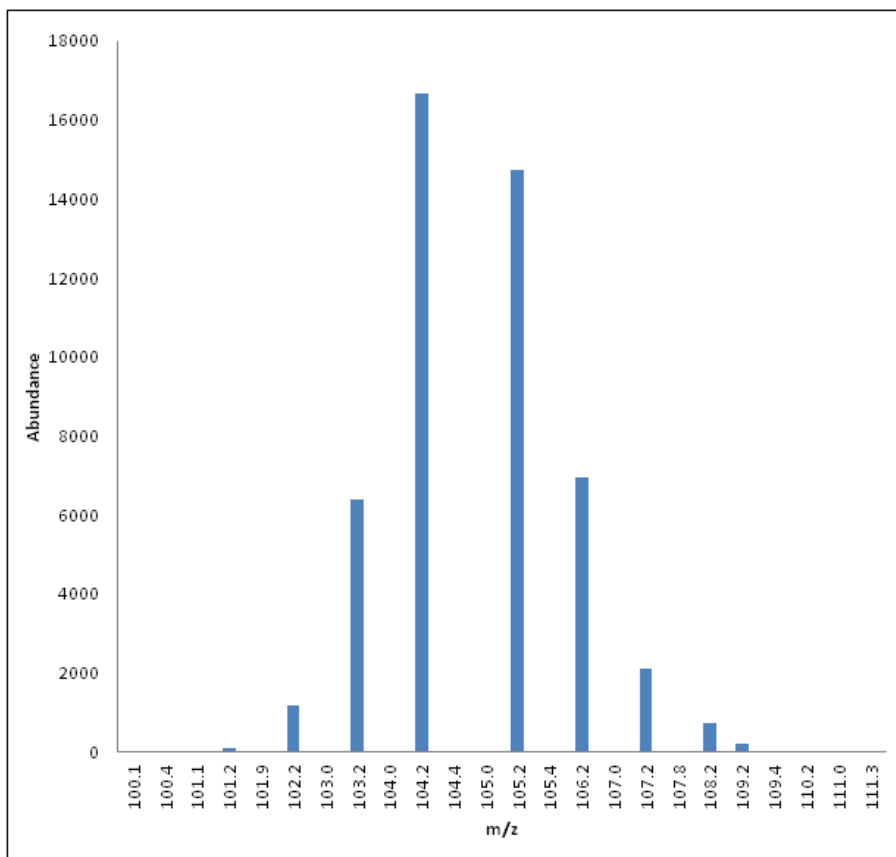

**Fig. S70** GC-MS data from the reaction mixture of **1**, D<sub>2</sub>, and styrene after 12 h. The spectrum of a mixture of styrene, *d*<sub>1</sub>-styrene, *d*<sub>2</sub>-styrene, *d*<sub>3</sub>-styrene, and ethylbenzene.

## XRD Data

For the structure of **10**, checkCIF reported one level A alert (PLAT971\_ALERT\_2\_A) due to a large calculated nonmetal positive residual density. This situation could arise from unaccounted atoms. In this data set, the highest residual electron density peak was located between the iron and boron, this electron density was attributed to the borohydride hydrogen atom that was intentionally not included in the model, as there was no satisfactory way to model this. Our spectroscopic data was consistent with our assignment of this compound with a borohydride unit on the TPB ligand.

**Table 1.** Crystallographic Data for Compounds **2, 3, 4, 5, 8**

|                                          | <b>2</b>                                                         | <b>3</b>                                          | <b>4</b>                                                             | <b>5</b>                                           | <b>8</b>                                          |
|------------------------------------------|------------------------------------------------------------------|---------------------------------------------------|----------------------------------------------------------------------|----------------------------------------------------|---------------------------------------------------|
| chem formula                             | C <sub>36</sub> H <sub>56</sub> BFeN <sub>2</sub> P <sub>3</sub> | C <sub>36</sub> H <sub>58</sub> BFeP <sub>3</sub> | C <sub>43</sub> H <sub>69</sub> BFeNP <sub>3</sub> Si <sub>0.5</sub> | C <sub>41</sub> H <sub>65</sub> BFeNP <sub>3</sub> | C <sub>38</sub> H <sub>58</sub> BFeP <sub>3</sub> |
| fw                                       | 676.4                                                            | 650.42                                            | 773.61                                                               | 731.51                                             | 674.41                                            |
| cryst syst                               | monoclinic                                                       | monoclinic                                        | rhombohedral                                                         | orthorhombic                                       | triclinic                                         |
| space group                              | P2(1)/c                                                          | P2(1)/n                                           | R-3                                                                  | Pna2(1)                                            | P-1                                               |
| a [Å]                                    | 10.9690(10)                                                      | 10.6196(6)                                        | 11.2415(3)                                                           | 28.1082(11)                                        | 11.7652(5)                                        |
| b [Å]                                    | 15.8820(14)                                                      | 21.3418(13)                                       | 11.2415(3)                                                           | 11.7188(5)                                         | 18.1293(8)                                        |
| c [Å]                                    | 20.7040(18)                                                      | 15.6111(9)                                        | 59.3261(18)                                                          | 12.0896(5)                                         | 18.8179(8)                                        |
| α [°]                                    | 90.00                                                            | 90.00                                             | 90.00                                                                | 90.00                                              | 112.296(2)                                        |
| β [°]                                    | 102.446(2)                                                       | 94.019(4)                                         | 90.00                                                                | 90.00                                              | 90.626(2)                                         |
| γ [°]                                    | 90.00                                                            | 90.00                                             | 120.00                                                               | 90.00                                              | 105.264(2)                                        |
| V [Å <sup>3</sup> ]                      | 3522.1(5)                                                        | 3529.4(4)                                         | 6492.7(3)                                                            | 3982.2(3)                                          | 3555.0(3)                                         |
| Z                                        | 4                                                                | 4                                                 | 6                                                                    | 4                                                  | 4                                                 |
| D <sub>calcd</sub> [g cm <sup>-3</sup> ] | 1.276                                                            | 1.218                                             | 1.187                                                                | 1.220                                              | 1.260                                             |
| F(000)                                   | 1444                                                             | 1388                                              | 2502                                                                 | 1576                                               | 1448                                              |
| μ [mm <sup>-1</sup> ]                    | 0.592                                                            | 0.586                                             | 0.503                                                                | 0.528                                              | 0.585                                             |
| temp. [K]                                | 100                                                              | 100                                               | 100                                                                  | 100                                                | 100                                               |
| wavelength [Å]                           | 0.71073                                                          | 0.71073                                           | 0.7103                                                               | 0.71073                                            | 0.71073                                           |
| measd rflns                              | 64963                                                            | 187522                                            | 46175                                                                | 125477                                             | 285706                                            |
| unique rflns                             | 8699                                                             | 20034                                             | 4245                                                                 | 17351                                              | 55462                                             |
| data/restraints/param                    | 8699/0/406                                                       | 20034/0/386                                       | 4245/88257                                                           | 17351/1/447                                        | 55462/0/831                                       |
| R(F) ( <i>I</i> >2σ( <i>I</i> ))         | 0.0505                                                           | 0.0548                                            | 0.1562                                                               | 0.0536                                             | 0.0418                                            |
| wR(F <sup>2</sup> ) (all)                | 0.1264                                                           | 0.1511                                            | 0.1683                                                               | 0.1336                                             | 0.1086                                            |
| GOF                                      | 1.035                                                            | 1.056                                             | 1.082                                                                | 1.441                                              | 1.030                                             |

**Table 2** Crystallographic Data for Compounds **10, 11, (SiP<sup>iPr</sup><sub>3</sub>)Fe(CO)(H)**.

|              | <b>10</b>                                         | <b>11</b>                                         | <b>(SiP<sup>iPr</sup><sub>3</sub>)Fe(CO)(H)</b>     |
|--------------|---------------------------------------------------|---------------------------------------------------|-----------------------------------------------------|
| chem formula | C <sub>45</sub> H <sub>62</sub> BFeP <sub>3</sub> | C <sub>48</sub> H <sub>81</sub> BFeP <sub>4</sub> | C <sub>37</sub> H <sub>55</sub> FeP <sub>3</sub> Si |

|                                          |             |             |              |
|------------------------------------------|-------------|-------------|--------------|
| fw                                       | 762.52      | 854.44      | 692.66       |
| cryst syst                               | monoclinic  | monoclinic  | monoclinic   |
| space group                              | P2(1)/c     | C2/c        | C2/c         |
| a [Å]                                    | 25.3343(11) | 14.7183(8)  | 36.5798(8)   |
| b [Å]                                    | 15.1553(6)  | 22.2944(13) | 11.7777(3)   |
| c [Å]                                    | 23.4782(1)  | 14.8410(9)  | 17.1309(4)   |
| $\alpha$ [°]                             | 90.00       | 90.00       | 90.00        |
| $\beta$ [°]                              | 113.176(2)  | 103.864(3)  | 104.2430(10) |
| $\gamma$ [°]                             | 90.00       | 90.00       | 90.00        |
| V [Å <sup>3</sup> ]                      | 8287.0(6)   | 4728.0(5)   | 7153.6(3)    |
| Z                                        | 8           | 8           | 8            |
| D <sub>calcd</sub> [g cm <sup>-3</sup> ] | 1.222       | 1.200       | 1.286        |
| F(000)                                   | 3264        | 1840        | 2960         |
| $\mu$ [mm <sup>-1</sup> ]                | 0.510       | 0.486       | 5.175        |
| temp. [K]                                | 100         | 100         | 100          |
| wavelength [Å]                           | 0.71073     | 0.71073     | 1.54178      |
| measd rflns                              | 256649      | 143163      | 50397        |
| unique rflns                             | 41264       | 22688       | 6480         |
| data/restraints/param                    | 41264/0/927 | 22688/0/265 | 6580/0/404   |
| R(F) ( $I > 2\sigma(I)$ )                | 0.0684      | 0.0385      | 0.0.0273     |
| wR(F <sup>2</sup> ) (all)                | 0.207       | 0.1407      | 0.0703       |
| GOF                                      | 1.239       | 0.928       | 1.046        |

---

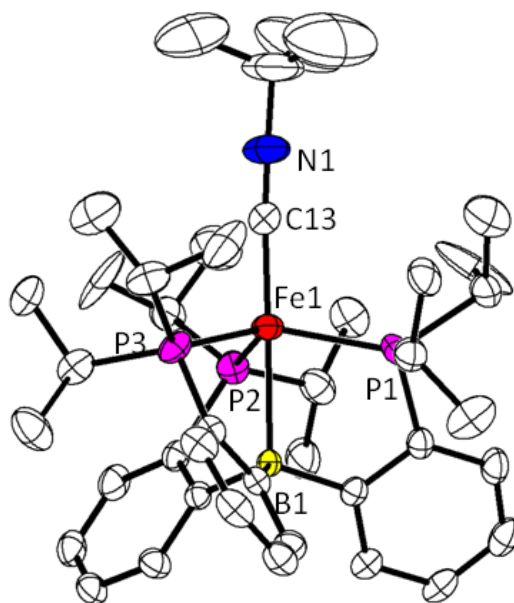

**Fig. S71** XRD structure of **4**, (TPB)Fe(CN'Bu). Ellipsoids shown at 50% probability. The CN'Bu unit is disordered over three positions, and therefore the Fe-C13 and C13-N1 bond distance are reported as an average of the three Fe-C13 and three C13-N1 positions, respectively. Selected bond distances (Å) and angles (°): Fe1-P1 = 2.3193(7), Fe-P2 = 2.3193(7), Fe-P3 = 2.3194(7), 2.320(4), Fe-C13(avg) = 1.861(7), C13-N1(avg) = 1.179(9), Fe1-B1 = 2.340(4),  $\Sigma(\text{P-Fe-P}) = 345.03(1)$ .

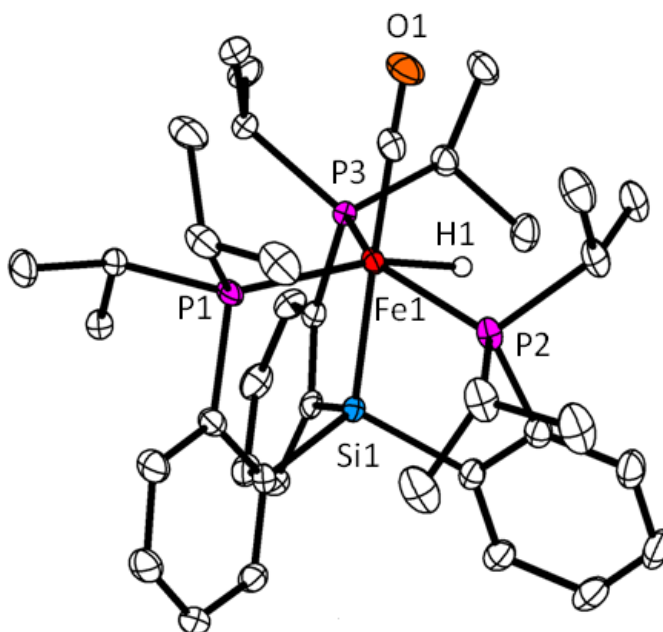

**Fig. S72** XRD structure of **(SiP<sup>iPr</sup><sub>3</sub>)Fe(CO)(H)**. Ellipsoids shown at 50% probability. Selected bond distances (Å) and angles (°): Fe1-P1 = 2.2559(4), Fe1-P2 = 2.2495(4), Fe1-P3 = 2.2214(4),



Fe1-H1 = 1.43(2), Fe1-C11 = 1.768(2), Fe1-Si1 = 2.2567(4), P3-Fe1-P1 = 106.05(2), P1-Fe1-P2 = 110.27(2), P2-Fe1-H1 = 66.4(1), P3-Fe1-H1 = 73.4(1).

## **DFT Coordinates**

Input Coordinates [Angstroms] for **3**.

| Atom | X       | Y       | Z       |
|------|---------|---------|---------|
| Fe1  | 7.0892  | 3.3857  | 12.2773 |
| P2   | 6.2154  | 4.9695  | 10.9253 |
| P3   | 6.3100  | 1.7194  | 13.5222 |
| P4   | 9.0349  | 2.5824  | 11.4387 |
| C5   | 7.4214  | 1.7948  | 9.3360  |
| C6   | 5.6392  | 0.3697  | 12.4353 |
| C7   | 4.8685  | 4.1771  | 9.9445  |
| C8   | 7.4635  | 0.8606  | 14.7392 |
| H9   | 8.0191  | 0.2295  | 14.1978 |
| C10  | 9.8530  | 1.0030  | 12.0884 |
| H11  | 9.8330  | 1.0491  | 13.0872 |
| C12  | 4.8036  | 2.0676  | 14.5617 |
| H13  | 4.5867  | 1.2325  | 15.0673 |
| C14  | 8.7510  | 2.1101  | 9.7008  |
| C15  | 5.2385  | -0.5595 | 10.2519 |
| H16  | 5.3171  | -0.5024 | 9.3069  |
| C17  | 10.5206 | 3.7094  | 11.4651 |
| H18  | 11.2755 | 3.2347  | 11.0125 |
| C19  | 5.0476  | 3.1776  | 15.5871 |
| H20  | 5.3517  | 3.9872  | 15.1261 |
| H21  | 5.7329  | 2.8881  | 16.2251 |

|     |         |         |         |
|-----|---------|---------|---------|
| H22 | 4.2145  | 3.3681  | 16.0667 |
| C23 | 4.9283  | 2.7889  | 9.7092  |
| B24 | 6.1465  | 1.8979  | 10.3262 |
| C25 | 5.3890  | 6.3828  | 11.8189 |
| H26 | 5.0302  | 7.0020  | 11.1204 |
| C27 | 5.6802  | 0.5224  | 11.0342 |
| C28 | 5.0689  | -0.7882 | 12.9948 |
| H29 | 5.0133  | -0.8714 | 13.9395 |
| C30 | 7.1382  | 5.9445  | 9.5853  |
| H31 | 8.0124  | 6.2199  | 9.9851  |
| C32 | 8.4446  | 1.8599  | 15.3701 |
| H33 | 7.9582  | 2.4569  | 15.9762 |
| H34 | 8.8717  | 2.3885  | 14.6640 |
| H35 | 9.1300  | 1.3719  | 15.8727 |
| C36 | 7.4706  | 5.0600  | 8.3760  |
| H37 | 6.6454  | 4.8405  | 7.8952  |
| H38 | 7.8991  | 4.2340  | 8.6834  |
| H39 | 8.0796  | 5.5407  | 7.7773  |
| C40 | 9.7846  | 2.0456  | 8.7566  |
| H41 | 10.6727 | 2.2599  | 9.0171  |
| C42 | 3.8254  | 4.9429  | 9.3991  |
| H43 | 3.7925  | 5.8773  | 9.5672  |
| C44 | 3.6045  | 2.3909  | 13.6695 |
| H45 | 2.8462  | 2.6632  | 14.2274 |
| H46 | 3.3597  | 1.5963  | 13.1507 |
| H47 | 3.8392  | 3.1204  | 13.0586 |
| C48 | 3.9098  | 2.2249  | 8.9233  |

|     |         |         |         |
|-----|---------|---------|---------|
| H49 | 3.9188  | 1.2880  | 8.7665  |
| C50 | 6.4709  | 7.2239  | 9.0745  |
| H51 | 7.0280  | 7.6263  | 8.3758  |
| H52 | 6.3682  | 7.8570  | 9.8154  |
| H53 | 5.5893  | 7.0075  | 8.7052  |
| C54 | 4.5871  | -1.8088 | 12.1928 |
| H55 | 4.1865  | -2.5750 | 12.5865 |
| C56 | 6.8391  | 0.0245  | 15.8596 |
| H57 | 7.5490  | -0.4047 | 16.3814 |
| H58 | 6.2591  | -0.6627 | 15.4701 |
| H59 | 6.3096  | 0.6057  | 16.4447 |
| C60 | 2.8901  | 2.9860  | 8.3668  |
| H61 | 2.2311  | 2.5755  | 7.8193  |
| C62 | 7.2004  | 1.4149  | 8.0059  |
| H63 | 6.3184  | 1.1888  | 7.7350  |
| C64 | 4.6910  | -1.7096 | 10.8094 |
| H65 | 4.3917  | -2.4187 | 10.2524 |
| C66 | 9.0588  | -0.2383 | 11.6768 |
| H67 | 9.1137  | -0.3539 | 10.7052 |
| H68 | 8.1213  | -0.1284 | 11.9403 |
| H69 | 9.4327  | -1.0276 | 12.1213 |
| C70 | 9.5251  | 1.6716  | 7.4433  |
| H71 | 10.2313 | 1.6319  | 6.8091  |
| C72 | 10.9349 | 3.9804  | 12.9140 |
| H73 | 11.7631 | 4.5043  | 12.9244 |
| H74 | 11.0812 | 3.1289  | 13.3766 |
| H75 | 10.2257 | 4.4814  | 13.3683 |

|     |         |         |         |
|-----|---------|---------|---------|
| C76 | 11.3158 | 0.7914  | 11.6731 |
| H77 | 11.6308 | -0.0714 | 12.0148 |
| H78 | 11.8681 | 1.5109  | 12.0440 |
| H79 | 11.3822 | 0.7994  | 10.6954 |
| C80 | 4.2180  | 5.9867  | 12.7098 |
| H81 | 4.5494  | 5.4728  | 13.4756 |
| H82 | 3.5879  | 5.4388  | 12.1967 |
| H83 | 3.7635  | 6.7938  | 13.0300 |
| C84 | 8.2283  | 1.3566  | 7.0647  |
| H85 | 8.0412  | 1.1024  | 6.1687  |
| C86 | 10.2983 | 5.0343  | 10.7429 |
| H87 | 9.5863  | 5.5359  | 11.1922 |
| H88 | 10.0392 | 4.8605  | 9.8139  |
| H89 | 11.1266 | 5.5579  | 10.7585 |
| C90 | 6.4391  | 7.1571  | 12.6066 |
| H91 | 6.0235  | 7.9418  | 13.0213 |
| H92 | 7.1533  | 7.4472  | 12.0014 |
| H93 | 6.8157  | 6.5803  | 13.3036 |
| C94 | 2.8403  | 4.3515  | 8.6163  |
| H95 | 2.1373  | 4.8781  | 8.2543  |
| H96 | 7.7936  | 4.4965  | 13.0456 |
| H97 | 6.1119  | 2.5661  | 11.3356 |
| H98 | 5.5742  | 3.9412  | 12.7631 |
| H99 | 7.6061  | 3.8751  | 13.6692 |

Optimized Coordinates [Angstroms] for **3**.

| Atom | X         | Y         | Z         |
|------|-----------|-----------|-----------|
| Fe   | -0.117363 | -0.103709 | -1.103449 |
| P    | 2.189154  | -0.527524 | -0.974334 |
| P    | -2.110168 | -1.097370 | -0.669335 |
| P    | -0.495046 | 2.097951  | -0.509807 |
| C    | 0.557719  | 1.210908  | 1.905336  |
| C    | -2.289533 | -1.265061 | 1.185877  |
| C    | 2.398779  | -1.501535 | 0.603316  |
| C    | -3.739797 | -0.319060 | -1.304037 |
| H    | -3.935678 | 0.481024  | -0.581651 |
| C    | -2.244839 | 2.804105  | -0.149723 |
| H    | -2.864935 | 2.420681  | -0.967491 |
| C    | -2.289253 | -2.902115 | -1.205735 |
| H    | -3.305210 | -3.193056 | -0.909139 |
| C    | 0.340006  | 2.361059  | 1.107017  |
| C    | -1.488008 | -0.919697 | 3.434453  |
| H    | -0.728123 | -0.556314 | 4.122165  |
| C    | 0.142115  | 3.432562  | -1.689312 |
| H    | -0.044777 | 4.397240  | -1.205753 |
| C    | -2.165118 | -3.071941 | -2.726949 |
| H    | -1.191476 | -2.720780 | -3.083971 |
| H    | -2.940675 | -2.530873 | -3.277379 |
| H    | -2.254219 | -4.132594 | -2.993963 |
| C    | 1.473498  | -1.330507 | 1.668838  |
| B    | 0.195832  | -0.323105 | 1.495591  |
| C    | 2.798812  | -1.680971 | -2.347740 |
| H    | 3.852423  | -1.876162 | -2.127295 |

|   |           |           |           |
|---|-----------|-----------|-----------|
| C | -1.239985 | -0.848222 | 2.050338  |
| C | -3.471830 | -1.799589 | 1.728733  |
| H | -4.253225 | -2.170741 | 1.075798  |
| C | 3.691494  | 0.677613  | -0.899092 |
| H | 3.470769  | 1.407098  | -1.684418 |
| C | -3.505372 | 0.333733  | -2.680895 |
| H | -3.294086 | -0.414580 | -3.452325 |
| H | -2.669789 | 1.036941  | -2.672919 |
| H | -4.404304 | 0.880373  | -2.993743 |
| C | 3.746161  | 1.422730  | 0.441786  |
| H | 3.994064  | 0.738860  | 1.260149  |
| H | 2.804651  | 1.908812  | 0.693765  |
| H | 4.527094  | 2.193536  | 0.403050  |
| C | 0.711622  | 3.638220  | 1.560628  |
| H | 0.561304  | 4.508280  | 0.927308  |
| C | 3.481491  | -2.385232 | 0.745338  |
| H | 4.176673  | -2.536768 | -0.074768 |
| C | -1.312394 | -3.828258 | -0.466705 |
| H | -1.473362 | -4.863949 | -0.793030 |
| H | -1.456237 | -3.789087 | 0.616280  |
| H | -0.272926 | -3.564130 | -0.677826 |
| C | 1.696997  | -2.079783 | 2.836318  |
| H | 0.987353  | -2.001644 | 3.656059  |
| C | 5.085519  | 0.096660  | -1.197642 |
| H | 5.828916  | 0.898806  | -1.100536 |
| H | 5.183824  | -0.306500 | -2.209599 |
| H | 5.364783  | -0.684472 | -0.482873 |

|   |           |           |           |
|---|-----------|-----------|-----------|
| C | -3.669798 | -1.883983 | 3.105156  |
| H | -4.595086 | -2.298153 | 3.497659  |
| C | -5.004553 | -1.193462 | -1.381641 |
| H | -5.841727 | -0.581473 | -1.742019 |
| H | -5.305651 | -1.605488 | -0.416606 |
| H | -4.889728 | -2.023698 | -2.086313 |
| C | 2.779234  | -2.950070 | 2.975381  |
| H | 2.909271  | -3.514167 | 3.896287  |
| C | 1.152356  | 1.427350  | 3.164235  |
| H | 1.375110  | 0.570106  | 3.795130  |
| C | -2.674650 | -1.421518 | 3.964739  |
| H | -2.818949 | -1.457317 | 5.042135  |
| C | -2.801901 | 2.267918  | 1.177816  |
| H | -2.270525 | 2.708142  | 2.027612  |
| H | -2.721488 | 1.185846  | 1.271094  |
| H | -3.861440 | 2.540145  | 1.269503  |
| C | 1.298830  | 3.811306  | 2.812495  |
| H | 1.592369  | 4.803024  | 3.147217  |
| C | -0.645475 | 3.398108  | -3.010799 |
| H | -0.313814 | 4.213828  | -3.665486 |
| H | -1.725567 | 3.505694  | -2.871110 |
| H | -0.470567 | 2.457320  | -3.546250 |
| C | -2.376349 | 4.338058  | -0.140023 |
| H | -3.411317 | 4.602903  | 0.112114  |
| H | -2.150713 | 4.806726  | -1.101327 |
| H | -1.736151 | 4.790704  | 0.625005  |
| C | 2.103946  | -3.045207 | -2.427214 |

|   |           |           |           |
|---|-----------|-----------|-----------|
| H | 1.063506  | -2.951511 | -2.746457 |
| H | 2.115421  | -3.566171 | -1.465403 |
| H | 2.625872  | -3.675970 | -3.159338 |
| C | 1.512796  | 2.694455  | 3.620488  |
| H | 1.977885  | 2.807795  | 4.597084  |
| C | 1.641650  | 3.339927  | -1.978191 |
| H | 1.877058  | 2.418949  | -2.520292 |
| H | 2.239501  | 3.364668  | -1.063776 |
| H | 1.951206  | 4.184187  | -2.607950 |
| C | 2.731779  | -0.952235 | -3.701238 |
| H | 3.193530  | -1.564813 | -4.485869 |
| H | 3.250280  | 0.012676  | -3.686080 |
| H | 1.693400  | -0.767375 | -3.998994 |
| C | 3.678194  | -3.106957 | 1.923165  |
| H | 4.518322  | -3.791753 | 2.007788  |
| H | -0.240391 | 0.470276  | -2.609097 |
| H | 0.044374  | -0.638129 | 0.304406  |
| H | 0.177952  | -1.558901 | -1.337277 |
| H | -0.226467 | -0.377846 | -2.662552 |

Total Energy [a.u.]: -3719.2736777

Input Coordinates [Angstroms] Equatorial H<sub>2</sub> Isomer of **3**.

|     |        |        |         |
|-----|--------|--------|---------|
| Fe1 | 7.0892 | 3.3857 | 12.2773 |
| P2  | 6.2154 | 4.9695 | 10.9253 |
| P3  | 6.3100 | 1.7194 | 13.5222 |



|     |         |         |         |
|-----|---------|---------|---------|
| P4  | 9.0349  | 2.5824  | 11.4387 |
| C5  | 7.4214  | 1.7948  | 9.3360  |
| C6  | 5.6392  | 0.3697  | 12.4353 |
| C7  | 4.8685  | 4.1771  | 9.9445  |
| C8  | 7.4635  | 0.8606  | 14.7392 |
| H9  | 8.0191  | 0.2295  | 14.1978 |
| C10 | 9.8530  | 1.0030  | 12.0884 |
| H11 | 9.8330  | 1.0491  | 13.0872 |
| C12 | 4.8036  | 2.0676  | 14.5617 |
| H13 | 4.5867  | 1.2325  | 15.0673 |
| C14 | 8.7510  | 2.1101  | 9.7008  |
| C15 | 5.2385  | -0.5595 | 10.2519 |
| H16 | 5.3171  | -0.5024 | 9.3069  |
| C17 | 10.5206 | 3.7094  | 11.4651 |
| H18 | 11.2755 | 3.2347  | 11.0125 |
| C19 | 5.0476  | 3.1776  | 15.5871 |
| H20 | 5.3517  | 3.9872  | 15.1261 |
| H21 | 5.7329  | 2.8881  | 16.2251 |
| H22 | 4.2145  | 3.3681  | 16.0667 |
| C23 | 4.9283  | 2.7889  | 9.7092  |
| B24 | 6.1465  | 1.8979  | 10.3262 |
| C25 | 5.3890  | 6.3828  | 11.8189 |
| H26 | 5.0302  | 7.0020  | 11.1204 |
| C27 | 5.6802  | 0.5224  | 11.0342 |
| C28 | 5.0689  | -0.7882 | 12.9948 |
| H29 | 5.0133  | -0.8714 | 13.9395 |
| C30 | 7.1382  | 5.9445  | 9.5853  |

|     |         |         |         |
|-----|---------|---------|---------|
| H31 | 8.0124  | 6.2199  | 9.9851  |
| C32 | 8.4446  | 1.8599  | 15.3701 |
| H33 | 7.9582  | 2.4569  | 15.9762 |
| H34 | 8.8717  | 2.3885  | 14.6640 |
| H35 | 9.1300  | 1.3719  | 15.8727 |
| C36 | 7.4706  | 5.0600  | 8.3760  |
| H37 | 6.6454  | 4.8405  | 7.8952  |
| H38 | 7.8991  | 4.2340  | 8.6834  |
| H39 | 8.0796  | 5.5407  | 7.7773  |
| C40 | 9.7846  | 2.0456  | 8.7566  |
| H41 | 10.6727 | 2.2599  | 9.0171  |
| C42 | 3.8254  | 4.9429  | 9.3991  |
| H43 | 3.7925  | 5.8773  | 9.5672  |
| C44 | 3.6045  | 2.3909  | 13.6695 |
| H45 | 2.8462  | 2.6632  | 14.2274 |
| H46 | 3.3597  | 1.5963  | 13.1507 |
| H47 | 3.8392  | 3.1204  | 13.0586 |
| C48 | 3.9098  | 2.2249  | 8.9233  |
| H49 | 3.9188  | 1.2880  | 8.7665  |
| C50 | 6.4709  | 7.2239  | 9.0745  |
| H51 | 7.0280  | 7.6263  | 8.3758  |
| H52 | 6.3682  | 7.8570  | 9.8154  |
| H53 | 5.5893  | 7.0075  | 8.7052  |
| C54 | 4.5871  | -1.8088 | 12.1928 |
| H55 | 4.1865  | -2.5750 | 12.5865 |
| C56 | 6.8391  | 0.0245  | 15.8596 |
| H57 | 7.5490  | -0.4047 | 16.3814 |

|     |         |         |         |
|-----|---------|---------|---------|
| H58 | 6.2591  | -0.6627 | 15.4701 |
| H59 | 6.3096  | 0.6057  | 16.4447 |
| C60 | 2.8901  | 2.9860  | 8.3668  |
| H61 | 2.2311  | 2.5755  | 7.8193  |
| C62 | 7.2004  | 1.4149  | 8.0059  |
| H63 | 6.3184  | 1.1888  | 7.7350  |
| C64 | 4.6910  | -1.7096 | 10.8094 |
| H65 | 4.3917  | -2.4187 | 10.2524 |
| C66 | 9.0588  | -0.2383 | 11.6768 |
| H67 | 9.1137  | -0.3539 | 10.7052 |
| H68 | 8.1213  | -0.1284 | 11.9403 |
| H69 | 9.4327  | -1.0276 | 12.1213 |
| C70 | 9.5251  | 1.6716  | 7.4433  |
| H71 | 10.2313 | 1.6319  | 6.8091  |
| C72 | 10.9349 | 3.9804  | 12.9140 |
| H73 | 11.7631 | 4.5043  | 12.9244 |
| H74 | 11.0812 | 3.1289  | 13.3766 |
| H75 | 10.2257 | 4.4814  | 13.3683 |
| C76 | 11.3158 | 0.7914  | 11.6731 |
| H77 | 11.6308 | -0.0714 | 12.0148 |
| H78 | 11.8681 | 1.5109  | 12.0440 |
| H79 | 11.3822 | 0.7994  | 10.6954 |
| C80 | 4.2180  | 5.9867  | 12.7098 |
| H81 | 4.5494  | 5.4728  | 13.4756 |
| H82 | 3.5879  | 5.4388  | 12.1967 |
| H83 | 3.7635  | 6.7938  | 13.0300 |
| C84 | 8.2283  | 1.3566  | 7.0647  |

|     |         |        |         |
|-----|---------|--------|---------|
| H85 | 8.0412  | 1.1024 | 6.1687  |
| C86 | 10.2983 | 5.0343 | 10.7429 |
| H87 | 9.5863  | 5.5359 | 11.1922 |
| H88 | 10.0392 | 4.8605 | 9.8139  |
| H89 | 11.1266 | 5.5579 | 10.7585 |
| C90 | 6.4391  | 7.1571 | 12.6066 |
| H91 | 6.0235  | 7.9418 | 13.0213 |
| H92 | 7.1533  | 7.4472 | 12.0014 |
| H93 | 6.8157  | 6.5803 | 13.3036 |
| C94 | 2.8403  | 4.3515 | 8.6163  |
| H95 | 2.1373  | 4.8781 | 8.2543  |
| H96 | 6.0621  | 4.3819 | 12.7661 |
| H97 | 6.1119  | 2.5661 | 11.3356 |
| H98 | 5.8525  | 3.7823 | 13.3458 |
| H99 | 8.1010  | 4.0340 | 13.1064 |

Optimized Coordinates [Angstroms] Equatorial H<sub>2</sub> Isomer of **3**.

| Atom | X         | Y         | Z         |
|------|-----------|-----------|-----------|
| Fe   | -0.169384 | -0.006667 | -1.137838 |
| P    | 2.258741  | -0.406738 | -0.992751 |
| P    | -2.202927 | -0.975413 | -0.726372 |
| P    | -0.481004 | 2.102566  | -0.352019 |
| C    | 0.594437  | 0.992736  | 1.945652  |
| C    | -2.337217 | -1.312523 | 1.107806  |
| C    | 2.434018  | -1.556262 | 0.468037  |
| C    | -3.827785 | -0.132022 | -1.267356 |

|   |           |           |           |
|---|-----------|-----------|-----------|
| H | -3.986340 | 0.625945  | -0.492496 |
| C | -2.208951 | 2.811170  | 0.078801  |
| H | -2.844461 | 2.502521  | -0.758283 |
| C | -2.396109 | -2.735249 | -1.404395 |
| H | -3.388608 | -3.055817 | -1.061660 |
| C | 0.382192  | 2.217253  | 1.265009  |
| C | -1.450200 | -1.217034 | 3.347249  |
| H | -0.654850 | -0.950678 | 4.038955  |
| C | 0.170791  | 3.499228  | -1.442740 |
| H | 0.029813  | 4.422247  | -0.869483 |
| C | -2.378428 | -2.805242 | -2.939341 |
| H | -1.431007 | -2.444152 | -3.353500 |
| H | -3.181961 | -2.223084 | -3.398272 |
| H | -2.500674 | -3.846573 | -3.263309 |
| C | 1.470831  | -1.521727 | 1.513916  |
| B | 0.194500  | -0.499666 | 1.409975  |
| C | 2.859450  | -1.436591 | -2.471750 |
| H | 3.908821  | -1.663419 | -2.262178 |
| C | -1.241240 | -1.024798 | 1.967866  |
| C | -3.524396 | -1.847616 | 1.639641  |
| H | -4.342428 | -2.120617 | 0.983627  |
| C | 3.766074  | 0.770098  | -0.792268 |
| H | 3.562397  | 1.567056  | -1.513357 |
| C | -3.613464 | 0.597872  | -2.608577 |
| H | -3.520770 | -0.108823 | -3.439905 |
| H | -2.710463 | 1.210665  | -2.611229 |
| H | -4.476790 | 1.241411  | -2.821609 |

|   |           |           |           |
|---|-----------|-----------|-----------|
| C | 3.812265  | 1.391963  | 0.610706  |
| H | 4.015304  | 0.630513  | 1.370671  |
| H | 2.883321  | 1.891144  | 0.883325  |
| H | 4.621263  | 2.132614  | 0.654862  |
| C | 0.777099  | 3.441927  | 1.830455  |
| H | 0.629319  | 4.369181  | 1.283187  |
| C | 3.519479  | -2.446220 | 0.537488  |
| H | 4.242935  | -2.493311 | -0.270686 |
| C | -1.371845 | -3.708184 | -0.799404 |
| H | -1.585150 | -4.726356 | -1.149277 |
| H | -1.406437 | -3.711101 | 0.293002  |
| H | -0.348617 | -3.463509 | -1.099797 |
| C | 1.662294  | -2.409047 | 2.586585  |
| H | 0.925909  | -2.435103 | 3.385449  |
| C | 5.155613  | 0.198354  | -1.126529 |
| H | 5.903525  | 0.985551  | -0.965805 |
| H | 5.256642  | -0.127801 | -2.165426 |
| H | 5.424654  | -0.635721 | -0.470473 |
| C | -3.681587 | -2.056321 | 3.007937  |
| H | -4.611072 | -2.468377 | 3.392645  |
| C | -5.114435 | -0.973202 | -1.358209 |
| H | -5.936369 | -0.329519 | -1.697398 |
| H | -5.421465 | -1.400754 | -0.401885 |
| H | -5.027397 | -1.787507 | -2.084883 |
| C | 2.746261  | -3.285976 | 2.653789  |
| H | 2.849185  | -3.959649 | 3.501637  |
| C | 1.211603  | 1.083144  | 3.209941  |

|   |           |           |           |
|---|-----------|-----------|-----------|
| H | 1.432538  | 0.167941  | 3.754067  |
| C | -2.640176 | -1.718291 | 3.870556  |
| H | -2.751379 | -1.850150 | 4.944409  |
| C | -2.764666 | 2.199789  | 1.374398  |
| H | -2.212229 | 2.569029  | 2.244351  |
| H | -2.713151 | 1.112345  | 1.396237  |
| H | -3.815283 | 2.493105  | 1.498223  |
| C | 1.383782  | 3.488796  | 3.083828  |
| H | 1.695089  | 4.440478  | 3.507085  |
| C | -0.642695 | 3.607403  | -2.744311 |
| H | -0.296577 | 4.471982  | -3.324975 |
| H | -1.715987 | 3.734634  | -2.572330 |
| H | -0.506669 | 2.710226  | -3.356517 |
| C | -2.303713 | 4.343835  | 0.199783  |
| H | -3.330454 | 4.612273  | 0.479993  |
| H | -2.073966 | 4.875612  | -0.726490 |
| H | -1.648042 | 4.724442  | 0.990454  |
| C | 2.163373  | -2.789947 | -2.683506 |
| H | 1.157082  | -2.682197 | -3.097605 |
| H | 2.094139  | -3.367553 | -1.756969 |
| H | 2.742622  | -3.381668 | -3.404137 |
| C | 1.594644  | 2.297011  | 3.778334  |
| H | 2.074868  | 2.311601  | 4.754141  |
| C | 1.659324  | 3.381301  | -1.773340 |
| H | 1.850236  | 2.487979  | -2.375254 |
| H | 2.276509  | 3.337149  | -0.872493 |
| H | 1.978587  | 4.254093  | -2.357747 |

|   |           |           |           |
|---|-----------|-----------|-----------|
| C | 2.804695  | -0.581765 | -3.749889 |
| H | 3.207002  | -1.145870 | -4.601006 |
| H | 3.389380  | 0.340237  | -3.659117 |
| H | 1.774690  | -0.296171 | -3.991333 |
| C | 3.682486  | -3.307566 | 1.622848  |
| H | 4.525159  | -3.993838 | 1.651386  |
| H | -0.084383 | -0.894061 | -2.386664 |
| H | 0.033970  | -0.751208 | 0.197270  |
| H | 0.100419  | -1.448480 | -1.701706 |
| H | -0.375881 | 0.668759  | -2.502714 |

Total Energy [a.u.]: -3719.2638793

Optimized Coordinates [Angstroms] for Transition State

| Atom | X         | Y         | Z         |
|------|-----------|-----------|-----------|
| Fe   | -0.153028 | -0.042298 | -1.129626 |
| P    | 2.235083  | -0.444403 | -0.986249 |
| P    | -2.173700 | -1.017002 | -0.705395 |
| P    | -0.486434 | 2.101444  | -0.405994 |
| C    | 0.583969  | 1.066766  | 1.930243  |
| C    | -2.325357 | -1.287985 | 1.138340  |
| C    | 2.422333  | -1.537926 | 0.515085  |
| C    | -3.799990 | -0.202079 | -1.288214 |
| H    | -3.978163 | 0.572424  | -0.533999 |
| C    | -2.221617 | 2.810705  | -0.002643 |



|   |           |           |           |
|---|-----------|-----------|-----------|
| H | -2.851197 | 2.473823  | -0.833343 |
| C | -2.352851 | -2.797441 | -1.325424 |
| H | -3.352643 | -3.109399 | -0.996166 |
| C | 0.368277  | 2.268392  | 1.210858  |
| C | -1.462664 | -1.108490 | 3.382430  |
| H | -0.676398 | -0.812614 | 4.072586  |
| C | 0.159949  | 3.470785  | -1.534746 |
| H | 0.006645  | 4.411496  | -0.994573 |
| C | -2.297387 | -2.912836 | -2.856265 |
| H | -1.337486 | -2.565335 | -3.252545 |
| H | -3.087725 | -2.343222 | -3.352877 |
| H | -2.413262 | -3.962880 | -3.153199 |
| C | 1.471227  | -1.459226 | 1.568849  |
| B | 0.194563  | -0.442420 | 1.438447  |
| C | 2.836474  | -1.518152 | -2.430616 |
| H | 3.886530  | -1.737386 | -2.215908 |
| C | -1.241702 | -0.961224 | 1.999541  |
| C | -3.514251 | -1.813253 | 1.675862  |
| H | -4.323395 | -2.114711 | 1.021236  |
| C | 3.740804  | 0.742696  | -0.827257 |
| H | 3.533525  | 1.515751  | -1.572984 |
| C | -3.574646 | 0.497612  | -2.643513 |
| H | -3.432710 | -0.227677 | -3.451673 |
| H | -2.696094 | 1.145084  | -2.638968 |
| H | -4.453364 | 1.103848  | -2.898733 |
| C | 3.788335  | 1.409689  | 0.554644  |
| H | 4.004337  | 0.675083  | 1.337177  |

|   |           |           |           |
|---|-----------|-----------|-----------|
| H | 2.855138  | 1.906295  | 0.817140  |
| H | 4.589066  | 2.160480  | 0.570920  |
| C | 0.755780  | 3.511687  | 1.739295  |
| H | 0.605564  | 4.420743  | 1.163018  |
| C | 3.507620  | -2.425500 | 0.609262  |
| H | 4.222057  | -2.506874 | -0.204159 |
| C | -1.338691 | -3.745403 | -0.667138 |
| H | -1.525539 | -4.772425 | -1.006363 |
| H | -1.414167 | -3.730240 | 0.423177  |
| H | -0.310226 | -3.486983 | -0.934626 |
| C | 1.673363  | -2.300807 | 2.675773  |
| H | 0.945390  | -2.292805 | 3.482799  |
| C | 5.131698  | 0.165112  | -1.145664 |
| H | 5.878429  | 0.957919  | -1.008195 |
| H | 5.232772  | -0.191016 | -2.174703 |
| H | 5.402651  | -0.649249 | -0.465990 |
| C | -3.684324 | -1.975607 | 3.048936  |
| H | -4.614981 | -2.380806 | 3.438054  |
| C | -5.075270 | -1.060359 | -1.379355 |
| H | -5.903455 | -0.431340 | -1.730700 |
| H | -5.383443 | -1.483312 | -0.421343 |
| H | -4.971510 | -1.880541 | -2.097161 |
| C | 2.757388  | -3.175354 | 2.767568  |
| H | 2.869359  | -3.813234 | 3.641526  |
| C | 1.195512  | 1.199028  | 3.193355  |
| H | 1.418178  | 0.302192  | 3.766555  |
| C | -2.654283 | -1.601138 | 3.910183  |

|   |           |           |           |
|---|-----------|-----------|-----------|
| H | -2.775767 | -1.697587 | 4.986672  |
| C | -2.779470 | 2.229615  | 1.305692  |
| H | -2.232700 | 2.623226  | 2.168514  |
| H | -2.722118 | 1.143337  | 1.354101  |
| H | -3.832182 | 2.520102  | 1.417616  |
| C | 1.358164  | 3.600225  | 2.992542  |
| H | 1.663996  | 4.566017  | 3.386794  |
| C | -0.647677 | 3.526167  | -2.843226 |
| H | -0.302586 | 4.368705  | -3.455881 |
| H | -1.722258 | 3.655384  | -2.681073 |
| H | -0.505091 | 2.607773  | -3.422510 |
| C | -2.327568 | 4.345203  | 0.075377  |
| H | -3.357318 | 4.614581  | 0.343338  |
| H | -2.097063 | 4.852605  | -0.864427 |
| H | -1.677934 | 4.752242  | 0.857862  |
| C | 2.137274  | -2.874967 | -2.595941 |
| H | 1.115000  | -2.772291 | -2.969367 |
| H | 2.102347  | -3.435534 | -1.657241 |
| H | 2.691359  | -3.478082 | -3.327161 |
| C | 1.571565  | 2.431779  | 3.724731  |
| H | 2.048392  | 2.478930  | 4.701149  |
| C | 1.651241  | 3.355768  | -1.854090 |
| H | 1.852477  | 2.449292  | -2.432651 |
| H | 2.264323  | 3.337452  | -0.949587 |
| H | 1.967662  | 4.215802  | -2.458567 |
| C | 2.781724  | -0.705505 | -3.736021 |
| H | 3.197038  | -1.292175 | -4.565279 |

|   |           |           |           |
|---|-----------|-----------|-----------|
| H | 3.353955  | 0.226433  | -3.671632 |
| H | 1.750585  | -0.441862 | -3.996532 |
| C | 3.681739  | -3.241123 | 1.727798  |
| H | 4.523905  | -3.926950 | 1.775432  |
| H | -0.341452 | 0.553995  | -2.535008 |
| H | 0.034756  | -0.725955 | 0.232963  |
| H | 0.110276  | -1.452161 | -1.650877 |
| H | -0.111954 | -0.746250 | -2.437543 |

Total Energy [a.u.]: -3719.263037
